# Supplementary material for: The Late Capitanian Mass Extinction of Terrestrial Vertebrates in the Karoo Basin of South Africa
Source: Frontiers journal article supplement (doi:10.3389/feart.2021.631198), 2021-02-18
Supplement: Table_1.XLSX [file Table_1.XLSX]

## Sheet: Captions
Supplementary Table 1	Table showing selected specimen occurrence data within the upper Abrahamskraal and lower Teekloof formations. Columns represent approximately 50 m intervals. Single specimen occurrences have a value of 1 which is divided by the number of stratigraphic bins from which it may have originated.
Supplementary Table 2	Table showing the stratigraphic position of fossil specimens collected during fielwork at the three localities mentioned in the text: Puntkraal, Muggefontein, and 'Vanvuurenskop'.
Collections abbreviations
AM	Albany Museum, Grahamstown
TM	Ditsong Museum of Natural History, Pretoria
ESI	Evolutionary Studies Institute, Johannesburg
SAM	Iziko South African Museum, Cape Town
AMNH	American Museum of Natural History, New York
Berlin MFN	Museum fur Naturkunde, Berlin
BSP	Bayerische Staatssammlung für Paläontologie und Geologie, Munich
CGS	Council for Geoscience, Pretoria
GPIT	Palaeontologal collection of the University of Tubingen, Tubingen
MMK	McGRegor Museum, Kinberley
NHUK	Natural History Museum, London
NMB	National Museum, Bloemfontein
UM	University of Munich, Munich
USNM	United States National Museum, Washington
UST	University of Stellenbosch, Stellenbosch

## Sheet: Supplementary Table 1
Collection number	Number	Collection	Higher Taxon	Family or Clade	Genus	Species	Source of ID	Locality		Upper Moordenaars	Lower Karelskraal	Upper Karelskraal	Lower Poortjie	Middle Poortjie	Upper Poortjie	Lower Hoedemaker
5139	5140	MMK	Therocephalia	Scylacosauridae	Pristerognathus	polyodon	CFK 31-08-2015	Abrahamskraal 29, Prince Albert		0.125
AMNH 5502	5502	AMNH	Therocephalia	Scylacosauridae	Scylacosaurid		Kammerer pers comm 2015	Grootfontein 180, Beaufort West				0.5	0.5
AMNH 5543	5543	AMNH	Therocephalia	Lycosuchidae	Lycosuchidae		Abdala et al, 2014	Abrahamskraal 29, Prince Albert		0.125
AMNH 5559	5559	AMNH	Therocephalia	Scylacosauridae	Glanosuchus		Abdala	Grootfontein 180, Beaufort West			0.333333	0.333333	0.333333
AMNH 5560	5560	AMNH	Therocephalia	Scylacosauridae	Scylacosaurus		Abdala	"Beaufort West" unknown locality		0.166667	0.166667	0.166667	0.166667	0.166667	0.166667
BP/1/276	276	ESI	Therocephalia	Scylacosauridae	cf. Pristerognathus		M Day 2016 - narrow snouted form	Antjiesfontein, Leeukraal 24, Prince Albert		0.125	0.125
BP/1/281	281	ESI	Therocephalia	Scylacosauridae	Scylacosaurid		Abdala	Antjiesfontein, Leeukraal 24, Prince Albert		0.125	0.125
BP/1/7263	7263	ESI	Therocephalia	Scylacosauridae	cf. Scylacosaurid		M Day 2016	Brakleegte 297/Wolwehoek, Hendriks Kraal 298, Beaufort West		1
BP/1/7301	7301	ESI	Therocephalia	Lycosuchidae	c.f. Lycosuchidae		M Day 2016	Brakleegte 297/Wolwehoek, Hendriks Kraal 298, Beaufort West					1
BP/1/7373	7373	ESI	Therocephalia	?	Basal therocephalian indet.		M Day 2016	Brakleegte 297/Wolwehoek, Hendriks Kraal 298, Beaufort West			1
BP/1/7655	7655	ESI	Therocephalia	?	Scylacosaurid indet.		Christian Kammerer	Maritzhoek, Slingersfontein 232, Beaufort West		1
BP/1/7687	7687	ESI	Therocephalia	Lycosuchidae	Simorhinella	baini	Christian Kammerer	Tierhoek, Tygerhoek 468, Fraserburg				1
BP/1/7738	7738	ESI	Therocephalia		Scylacosaurid indet.		F Abdala	Muggefontein, farm 404, Beaufort West					1
BP/1/7769	7769	ESI	Therocephalia	Scylacosauridae	Glanosuchus		F. Abdala	Tierhoek, Tygerhoek 468, Fraserburg				1
C60	60	CGS	Therocephalia	Lycosuchidae	Lycosuchidae		Abdala et al, 2014	Tierhoek, Tygerhoek 468, Fraserburg				1
C61	61	CGS	Therocephalia	Scylacosauridae	Scylacosauridae		CFK 31-08-2015	Tierhoek, Tygerhoek 468, Fraserburg				1
D173		UST	Therocephalia	Lycosuchidae	Lycosuchus	vanderrieti	Abdala et al, 2014	Groot Vlakte between BW, PA and Willowmore.		0.125	0.125	0.125	0.125	0.125	0.125
F140		CGS	Therocephalia	Scylacosauridae	Pristerognathus	polyodon	CFK 31-08-2015	Puntkraal, Uitvlugt 90, Sutherland				1
MB R.995		Berlin MFN	Therocephalia	Lycosuchidae	Lycosuchus	vanderrieti	Abdala et al, 2014	[Beaufort West], Beaufort West		0.166667	0.166667	0.166667	0.166667	0.166667	0.166667
NMQR 3060	3060	NMB	Therocephalia	Scylacosauridae	Scylacosauridae		Day and Rubidge	Bloukrans 31, Prince Albert		0.142857	0.142857	0.142857
R49422		NHMUK	Therocephalia	Lycosuchidae	Simorhinella	baini	Abdala et al, 2014	Weltevreden 76, Prince Albert		0.111111	0.111111	0.111111
rd116		CGS	Therocephalia	Scylacosauridae	Glanosuchus?		Abdala	Kalkfontein 335, Fraserburg						0.5	0.5
RMS 1039	1039	CGS	Therocephalia	Lycosuchidae	Lycosuchidae		CFK 31-08-2015			0.166667
RMS 1041		CGS	Therocephalia	Lycosuchidae	Lycosuchidae?		Abdala	Varsch Fontein 27, Prince Albert		0.142857
RMS 1185	1185	CGS	Therocephalia	Scylacosauridae	Scylacosaurid		Abdala					1
RMS 1216	1216	CGS	Therocephalia	Scylacosauridae	Scylacosauridae		CFK 31-08-2015			0.333333	0.333333
RMS 1287	1287	CGS	Therocephalia	Scylacosauridae	Scylacosaurid		CFK 31-08-2015; Abdala (Lycosuchid?)	COORDS: 32 58’ 58”, 22 06’ 38”		0.25	0.25	0.25
RMS 888	888	CGS	Therocephalia	Lycosuchidae	Lycosuchidae		Abdala et al, 2014	Putfontein 320, Beaufort West		0.2	0.2	0.2	0.2	0.2
RMS 893	893	CGS	Therocephalia	Scylacosauridae	Scylacosaurid?		Abdala			0.5
RMS 935	935	CGS	Therocephalia	Scylacosauridae	Glanosuchus?		Abdala	Putfontein 320, Beaufort West					1
RMS 990		CGS	Therocephalia	Lycosuchidae	Lycosuchidae		Abdala et al, 2014			0.0909091
RS 330		CGS	Therocephalia	Scylacosauridae	Pristerognathus	polyodon	CFK 31-08-2015	Brandywyns Gat 214, Beaufort West						1
RS300b		CGS	Therocephalia	Scylacosauridae	Glanosuchus		Kammerer pers comm 2015	Brandywynsgat 214, Beaufort West							1
RS361	361	CGS	Therocephalia	Lycosuchidae	Lycosuchidae?		Abdala	Grootfontein 180, Beaufort West						1
RS424		CGS	Therocephalia	Scylacosauridae	Glanosuchus		Abdala	Kliplaatsfontein (Hartebees Vlei's Berg) 210, Beaufort West				1
SAM-PK-000630		SAM	Therocephalia	Scylacosauridae	Ictidosaurus	angusticeps	Van den Heever, 1987	Near Beaufort West			0.2	0.2	0.2	0.2	0.2
SAM-PK-000631		SAM	Therocephalia	Scylacosauridae	Pristerognathus	polyodon	Van den Heever, 1987	Koup		0.0625	0.0625	0.0625	0.0625
SAM-PK-000751		SAM	Therocephalia	Lycosuchidae	Lycosuchidae		Abdala et al, 2014	Seekoegat, Zeekoegat 22, Prince Albert		0.0769231	0.0769231	0.0769231
SAM-PK-000903		SAM	Therocephalia	Scylacosauridae	Glanosuchus		Van den Heever, 1987	Seekoegat, Zeekoegat 22, Prince Albert		0.0769231	0.0769231	0.0769231
SAM-PK-000921		SAM	Therocephalia	Scylacosauridae	Scylacosaurid		Van den Heever, 1987	Seekoegat, Zeekoegat 22, Prince Albert		0.0769231	0.0769231	0.0769231
SAM-PK-001075	1075	SAM	Therocephalia	Scylacosauridae	Scylacosauridae		Van den Heever, 1987	Rietfontein 56, Prince Albert		0.1	0.1	0.1
SAM-PK-001076	1076	SAM	Therocephalia	Lycosuchidae	Lycosuchidae		Abdala et al, 2014	Rietfontein 56, Prince Albert		0.1	0.1	0.1
SAM-PK-001079	1079	SAM	Therocephalia	Lycosuchidae	Lycosuchidae		Abdala et al, 2014	Rietfontein 56, Prince Albert		0.1	0.1	0.1
SAM-PK-002756	2756	SAM	Therocephalia	Lycosuchidae	Lycosuchidae		Abdala et al, 2014	Abrahamskraal 29, Prince Albert		0.125
SAM-PK-003415		SAM	Therocephalia	Scylacosauridae	Glanosuchus		Van den Heever, 1987	Klipbank, Klipbanksfontein 137, Beaufort West				0.5	0.5
SAM-PK-003611	3611	SAM	Therocephalia	Scylacosauridae	Scylacosauridae		Van den Heever, 1987	Bloukrans 31, Prince Albert		0.142857	0.142857	0.142857
SAM-PK-003713	3713	SAM	Therocephalia	Scylacosauridae	Glanosuchus		Van den Heever, 1987	Bloukrans 31, Prince Albert		0.142857	0.142857	0.142857
SAM-PK-004332	4332	SAM	Therocephalia	Scylacosauridae	Glanosuchus		Van den Heever, 1987	Wilgerbos, Lammers Kraal 11, Prince Albert		0.142857	0.142857	0.142857	0.142857
SAM-PK-006533	6533	SAM	Therocephalia	Scylacosauridae	Scylacosauridae		Van den Heever, 1987	Bloukrans 31, Prince Albert		0.142857	0.142857	0.142857
SAM-PK-011689		SAM	Therocephalia	Scylacosauridae	Scylacosaurid		Van den Heever, 1987	Goeiemoed 90, Prince Albert		0.111111	0.111111
SAM-PK-011695		SAM	Therocephalia	Lycosuchidae	Lycosuchidae?		Day	Celeryfontein, Sellery Fontein 426, Fraserburg		0.333333	0.333333	0.333333
SAM-PK-011794		SAM	Therocephalia	Scylacosauridae	Scylacosaurid		Van den Heever, 1987	Celeryfontein, Sellery Fontein 426, Fraserburg		0.333333	0.333333	0.333333
SAM-PK-011843		SAM	Therocephalia	Scylacosauridae	Glanosuchus		Van den Heever, 1987	Lammerkraal, Lammerskraal 11, Beaufort West		0.25
SAM-PK-011848	11848	SAM	Therocephalia	Scylacosauridae	Pristerognathus	polyodon	Van den Heever, 1987	Veldmans River 9, Prince Albert		0.166667
SAM-PK-011871	11871	SAM	Therocephalia	Scylacosauridae	Glanosuchus		Van den Heever, 1987	Perdewater, Veldmans River 9, Prince Albert		0.166667
SAM-PK-011872	11872	SAM	Therocephalia	Scylacosauridae	Scylacosauridae		Van den Heever, 1987	Perdewater, Veldmans River 9, Prince Albert		0.166667
SAM-PK-011873	11873	SAM	Therocephalia	Scylacosauridae	Scylacosauridae		Van den Heever, 1987	Perdewater, Veldmans River 9, Prince Albert		0.166667
SAM-PK-011874	11874	SAM	Therocephalia	Scylacosauridae	Glanosuchus		Van den Heever, 1987	Perdewater, Veldmans River 9, Prince Albert		0.166667
SAM-PK-011876	11876	SAM	Therocephalia	Scylacosauridae	Glanosuchus		Van den Heever, 1987	Perdewater, Veldmans River 9, Prince Albert		0.166667
SAM-PK-011891		SAM	Therocephalia	Scylacosauridae	Scylacosauridae		Van den Heever, 1987			0.25	0.25	0.25
SAM-PK-011893		SAM	Therocephalia	Scylacosauridae	Glanosuchus		Van den Heever, 1987	Lammerkraal, Lammerskraal 11, Beaufort West		0.25
SAM-PK-011957	11957	SAM	Therocephalia	Scylacosauridae	Ictidosaurus		Van den Heever, 1987	Abrahamskraal 29, Prince Albert		0.125
SAM-PK-011967		SAM	Therocephalia	Scylacosauridae	Glanosuchus		Van den Heever, 1987	Seekoegat, Zeekoegat 22, Prince Albert		0.0769231	0.0769231	0.0769231
SAM-PK-09356a		SAM	Therocephalia	Scylacosauridae	Glanosuchus		Van den Heever, 1987	Roggekloof, Roggenkloof 132, Sutherland		0.333333
SAM-PK-12185		SAM	Therocephalia	Lycosuchidae	Lycosuchidae		Abdala et al, 2014	Skuilkraal, Meyerspoort 326, Beaufort West		0.25	0.25	0.25	0.25
SAM-PK-583		SAM	Therocephalia	Scylacosauridae	Scylacosauridae		CFK 31-08-2015			0.5
SAM-PK-K07809		SAM	Therocephalia	Scylacosauridae	Glanosuchus		Abdala	La-de-da 178, Beaufort West		0.166667	0.166667	0.166667	0.166667	0.166667	0.166667
SAM-PK-K10001		SAM	Therocephalia	Lycosuchidae	Lycosuchidae?		Day	La-de-da 178, Beaufort West				1
SAM-PK-K10002		SAM	Therocephalia	Scylacosauridae	Scylacosauridae?		Day				0.5	0.5
SAM-PK-K10524		SAM	Therocephalia	Scylacosauridae	Scylacosaurid?		Day						0.333333	0.333333	0.333333
SAM-PK-K10540		SAM	Therocephalia	Scylacosauridae	Pristerognathus	polyodon	CFK 31-08-2015	Putfontein 320, Beaufort West				1
TM 1491		TM	Therocephalia	Scylacosauridae	Scylacosauridae		Van den Heever, 1987	Abrahamskraal 29, Prince Albert		0.125
TM 275		TM	Therocephalia	Lycosuchidae	Lycosuchidae		Abdala et al, 2014	Abrahamskraal 29, Prince Albert		0.125
UM 1936 II 9		UM	Therocephalia	Scylacosauridae	Glanosuchus		Abdala	Kleinwaterval, Spreeuw Fontein 26, Prince Albert		0.0833333	0.0833333
										Total Lycosuchidae and Scylacosauridae:
										10.4988	6.54837	14.7706	6.14702	3.85833	2.65833	0
Collection number	Number	Collection	Higher Taxon	Family or Clade	Genus	Species	Source of ID	Locality		Upper Moordenaars	Lower Karelskraal	Upper Karelskraal	Lower Poortjie	Middle Poortjie	Upper Poortjie	Lower Hoedemaker
BP/1/2233	2233	ESI	Parareptilia	Pareiasauria	Bradysaurus	baini	M Van den Brandt 2019	Kleinwaterval, Spreeuw Fontein 26, Prince Albert		0.0833333	0.0833333
BP/1/297	297	ESI	Parareptilia	Pareiasauria	Bradysaurus	seeleyi	M Van den Brandt	Kleinwaterval, Spreeuw Fontein 26, Prince Albert		0.0833333	0.0833333
BP/1/7014	7014	ESI	Parareptilia	Pareiasauria	Pareiasaur indet.		M Day 2016	Jakkalsfontein, Ratelfontein 74, Prince Albert		0.142857
BP/1/7213	7213	ESI	Parareptilia	Pareiasauria	Bradysaurus	baini	M Van den Brandt	Witfontein 85, Sutherland			1
BP/1/7241	7241	ESI	Parareptilia	Pareiasauria	Pareiasaur indet.		M Day 2016	Brakleegte 297/Wolwehoek, Hendriks Kraal 298, Beaufort West			1
BP/1/7247	7247	ESI	Parareptilia	Pareiasauria	Bradysaurus/Nochelesaurus		M Van den Brandt 2019	Brakleegte 297/Wolwehoek, Hendriks Kraal 298, Beaufort West			1
BP/1/7252	7252	ESI	Parareptilia	Pareiasauria	Nochelesaurus	alexanderi	M Van den Brandt 2019	Brakleegte 297/Wolwehoek, Hendriks Kraal 298, Beaufort West			1
BP/1/7266	7266	ESI	Parareptilia	Pareiasauria	Pareiasaur indet.		Marc van den Brandt	Brakleegte 297/Wolwehoek, Hendriks Kraal 298, Beaufort West			1
BP/1/7748	7748	ESI	Pareiasauria	Pareiasauria	Pareiasaur cf. Bradysurus		M Day 2016	Tierhoek, Tygerhoek 468, Fraserburg				1
CBT112		CGS	Parareptilia	Pareiasauria	Embrithosaurus	schwartzi	Lee 1997	Portugals River 218, Sutherland		0.5
NHMUK PV R 7782		NHMUK	Parareptilia	Pareiasauria	Embrithosaurus	schwartzi	Lee 1997	Hottentots River 296, Beaufort West		0.5	0.5
NHMUK R49426		NHMUK	Parareptilia	Pareiasauria	Bradysaurus	seeleyi	Type	Palmietfontein 229, Beaufort West			0.5	0.5
SAM-PK-000745		SAM	Parareptilia	Pareiasauria	Bradysaurus	baini	M van den Brandt 2019	Goeiemoed 90, Prince Albert		0.125	0.125	0.125
SAM-PK-003533	3533	SAM	Parareptilia	Pareiasauria	Bradysaurus	baini	M van den Brandt 2019	Hottentots River 296, Beaufort West		0.166667	0.166667	0.166667
SAM-PK-003718	3718	SAM	Parareptilia	Pareiasauria	Bradysaurus	baini	M van den Brandt 2019	Abrahamskraal 29, Prince Albert		0.125
SAM-PK-004347	4347	SAM	Parareptilia	Pareiasauria	Bradysaurus	baini	M van den Brandt 2019	Abrahamskraal, Prince Albert		0.125
SAM-PK-004350	4350	SAM	Parareptilia	Pareiasauria	Bradysaurus	baini	M van den Brandt 2019	Leeurivier, Rietfontein 306, Beaufort West		0.333333
SAM-PK-004999		SAM	Parareptilia	Pareiasauria	Bradysaurus	baini	M van den Brandt 2019	Grootfontein, Grootfontein 180, Beaufort West		0.25	0.25	0.25	0.25
SAM-PK-005012	5012	SAM	Parareptilia	Pareiasauria	Bradysaurus	baini	M van den Brandt 2019	Abrahamskraal 29, Prince Albert		0.125
SAM-PK-006238		SAM	Parareptilia	Pareiasauria	Nochelosaurus	alexanderi	M Van den Brandt; Lee, 1997	Boesmanskop, Bushman's Kop 302, Beaufort West		0.333333	0.333333	0.333333
SAM-PK-006239		SAM	Parareptilia	Pareiasauria	Nochelosaurus	alexanderi	M Van den Brandt; Lee, 1997	Boesmanskop, Bushman's Kop 302, Beaufort West		0.333333	0.333333	0.333333
SAM-PK-006240	6240	SAM	Parareptilia	Pareiasauria	Nochelosaurus	alexanderi	M Van den Brandt; Lee, 1997	Abrahamskraal 29, Prince Albert		0.125
SAM-PK-009095	9095	SAM	Parareptilia	Pareiasauria	Bradysaurus	baini	M van den Brandt 2019	Veldmans River 9, Prince Albert		0.166667
SAM-PK-009104		SAM	Parareptilia	Pareiasauria	Bradysaurus	baini	M van den Brandt 2019	Melkboschfontein, Melkbosch Fontein 75, Prince Albert		0.142857
SAM-PK-009105		SAM	Parareptilia	Pareiasauria	Embrithosaurus	schwartzi	M Van den Brandt	Melkboschfontein, Melkbosch Fontein 75, Prince Albert		0.142857
SAM-PK-009170		SAM	Parareptilia	Pareiasauria	Bradysaurus	baini	M van den Brandt 2019	Melkboschfontein, Melkbosch Fontein 75, Prince Albert		0.142857
SAM-PK-012251		SAM	Parareptilia	Pareiasauria	Bradysaurus	baini	M Van den Brandt	Beukesplaas, Gannakraal 422, Fraserburg			0.5	0.5
										Total Guadalupian pareiasaurs
										3.94643	7.875	3.20833	0.25	0	0	0
Collection number	Number	Collection	Higher Taxon	Family or Clade	Genus	Species	Source of ID	Locality		Upper Moordenaars	Lower Karelskraal	Upper Karelskraal	Lower Poortjie	Middle Poortjie	Upper Poortjie	Lower Hoedemaker
BP/1/7276	7276	ESI	Parareptilia	Pareiasauria	Pareiasaur indet.		M Day; R Smith	Losberg1, Blaauwkrans 216, Beaufort West							1
Taken from estimates in Day et al (2018), based on the numbers provided by Smith et al (2012)																5
										Total Lopingian pareiasaurs
										0	0	0	0	0	1	5
Collection number	Number	Collection	Higher Taxon	Family or Clade	Genus	Species	Source of ID	Locality		Upper Moordenaars	Lower Karelskraal	Upper Karelskraal	Lower Poortjie	Middle Poortjie	Upper Poortjie	Lower Hoedemaker
BP/1/7492	7492	ESI	Therocephalia	Baurioidea	Ictidosuchoides		Adam Huttenlocker	Muggefontein, farm 404, Beaufort West							1
RD111		CGS	Therocephalia	Ictidosuchoidea	Ictidosuchoid therocephalian		Kammerer pers comm 2014	Platfontein 28, Beaufort West							1
Taken from estimates in Day et al (2018), based on the numbers provided by Smith et al (2012)										Total Lopingian therocephalians						5
										0	0	0	0	0	2	5
Collection number	Number	Collection	Higher Taxon	Family or Clade	Genus	Species	Source of ID	Locality		Upper Moordenaars	Lower Karelskraal	Upper Karelskraal	Lower Poortjie	Middle Poortjie	Upper Poortjie	Lower Hoedemaker
5138	5138	MMK	Dinocephalia	Tapinocephalidae	Criocephalosaurus	vanderbyli	CFK 31-08-2015	Abrahamskraal 29, Prince Albert		0.125
AM 3746	3746	AM	Dinocephalia	Titanosuchidae	Titanosuchus		CFK 31-08-2015	Hottentots River 296, Beaufort West		0.166667	0.166667	0.166667
AMNH 5577		AMNH	Dinocephalia	Titanosuchidae	Jonkeria	truculenta	Sifelani Jirah 2019	Rietfontein 56, Prince Albert		0.25
AMNH 5602	5602	AMNH	Dinocephalia	Tapinocephalidae	Moschognathus?		CFK 31-08-2015	"Beaufort West" no locality		0.333333	0.333333	0.333333
AMNH 5626	5626	AMNH	Dinocephalia	Tapinocephalidae	Tapinocephalus	atherstonei	Kammerer pers comm 2015	Ganze Kraal 25, Prince Albert		0.142857	0.142857	0.142857
AMNH 5633	5633	AMNH	Dinocephalia	Titanosuchidae	Jonkeria	truculenta	Kammerer pers comm 2015; S Jirah 2019	Abrahamskraal 29, Prince Albert		0.125
AMNH 5655	5655	AMNH	Dinocephalia	Tapinocephalidae	Mormosaurus	seeleyi	CFK 31-08-2015	Abrahamskraal 29, Prince Albert		0.125
BP/1/1041	1041	ESI	Dinocephalia	Titanosuchidae	Titanosuchidae indet.		M Day 2016	Antjiesfontein, Leeukraal 24, Prince Albert		0.125	0.125
BP/1/7071	7071	ESI	Dinocephalia	Tapinocephalidae	cf. Mormosaurus		M Day 2016; Guven pers com.	Springfontein, Rondom 247, Baufort West				1
BP/1/7168	7168	ESI	Dinocephalia	Titanosuchidae	Titanosuchidae indet.		M Day 2016; Sifelani to describe	Puntkraal, Uitvlugt 90, Sutherland					1
BP/1/7169	7169	ESI	Dinocephalia	?	Tapinocephalidae indet.		M Day 2016	Puntkraal, Uitvlugt 90, Sutherland					1
BP/1/7172	7172	ESI	Dinocephalia	Tapinocephalidae	cf. Tapinocephalidae		M Day 2016	Puntkraal, Uitvlugt 90, Sutherland				1
BP/1/7173A	7173A	ESI	Dinocephalia	Anteosauria	cf. Anteosaurus		M Day 2016	Puntkraal, Uitvlugt 90, Sutherland		1
BP/1/7173B	7173B	ESI	Dinocephalia	?	Tapinocephalian indet.		M Day 2016	Puntkraal, Uitvlugt 90, Sutherland		1
BP/1/7184	7184	ESI	Dinocephalia	Anteosauria	cf. Anteosaurus		M Day 2016; B Rubidge	Puntkraal, Uitvlugt 90, Sutherland					1
BP/1/7186	7186	ESI	Dinocephalia	Tapinocephalidae	Tapinocephalidae indet.		M Day 2016	Puntkraal, Uitvlugt 90, Sutherland		1
BP/1/7214	7214	ESI	Dinocephalia	Tapinocephalidae	Criocephalosaurus	sp.	Day et al, 2015	Beaufort West Commonage, Steenrots Fontein 168, Beaufort West				1
BP/1/7240	7240	ESI	Dinocephalia	Tapinocephalidae	Tapinocephalidae indet.		M Day 2016	Puntkraal, Uitvlug 90, Sutherland					1
BP/1/7243	7243	ESI	Dinocephalia	Titanosuchidae	Titanosuchidae indet.		M Day 2016	Brakleegte 297/Wolwehoek, Hendriks Kraal 298, Beaufort West		1
BP/1/7244	7244	ESI	Dinocephalia	Anteosauria	Anteosaurus	magnificus	M Day 2016	Brakleegte 297/Wolwehoek, Hendriks Kraal 298, Beaufort West			1
BP/1/7245	7245	ESI	Dinocephalia	Anteosauria	Dinocephalian indet.		M Day 2016	Brakleegte 297/Wolwehoek, Hendriks Kraal 298, Beaufort West			1
BP/1/7249	7249	ESI	Dinocephalia	Anteosauria	Anteosaurus	magnificus	M Day 2016	Brakleegte 297/Wolwehoek, Hendriks Kraal 298, Beaufort West		1
BP/1/7259	7259	ESI	Dinocephalia	Titanosuchidae	Titanosuchidae indet.		M Day 2016	Brakleegte 297/Wolwehoek, Hendriks Kraal 298, Beaufort West				1
BP/1/7261	7261	ESI	Dinocephalia	Tapinocephalidae	Tapinocephalidae indet.		M Day 2016	Brakleegte 297/Wolwehoek, Hendriks Kraal 298, Beaufort West		1
BP/1/7380	7380	ESI	Dinocephalia	Titanosuchidae	Titanosuchidae indet.		M Day 2016	Puntkraal, Uitvlug 90, Sutherland			1
BP/1/7688	7688	ESI	Dinocephalia	?	Tapinocephalian indet.		M Day 2016	Tierhoek, Tygerhoek 468, Fraserburg				1
BP/1/7698	7698	ESI	Dinocephalia	Tapinocephalidae	cf. Tapinocephalidae		M Day 2016	Tierhoek, Tygerhoek 468, Fraserburg					1
CBT118		CGS	Dinocephalia	Anteosauria	Anteosaurus		CFK 31-08-2015	De Vreede 133, Sutherland		0.5
CGP/1/846 (RMS 1244)		CGS	Dinocephalia	Tapinocephalidae	Criocephalosaurus		Day et al, 2015	Vlakfontein 325, Beaufort West			0.5	0.5
GPIT/RE/7102		GPIT	Dinocephalia	Tapinocephalidae	Struthiocephalus	whaitsi	Kammerer pers comm 2015	Abrahamskraal 29, Prince Albert		0.125
Huene 1931 T. 167F4, F8-10		GPIT	Dinocephalia	Tapinocephalidae	Struthiocephalus		CFK 31-08-2015	Abrahamskraal 29, Prince Albert		0.125
MB.R 983		Berlin MFN	Dinocephalia	Titanosuchidae	Jonkeria	truculenta	Sifelani Jirah 2019	Springfontein, Springfontein 305, Beaufort West		0.333333
NMQR 3074	3074	NMB	Dinocephalia	Anteosauria	Anteosaurus		CFK 31-08-2015	Bloukrans 31, Prince Albert		0.142857	0.142857	0.142857
R 43525	43525	NHMUK	Dinocephalia	Tapinocephalidae	Tapinocephalidae indet. (Phocosaurus)		CFK 31-08-2015	Varsfontein, Varsch fontein 27, Prince Albert		0.142857
RMS 1322	1322	CGS	Dinocephalia	Tapinocephalidae	Moschops		CFK 31-08-2015	Muggefontein, Slingersfontein 232, Beaufort West			1
SAM-PK-000731	731	SAM	Dinocephalia	Titanosuchidae	Titanosuchus		CFK 31-08-2015	Abrahamskraal 29, Prince Albert		0.125
SAM-PK-000738	738	SAM	Dinocephalia	Titanosuchidae	Jonkeria	truculenta	Sifelani Jirah 2019	Abrahamskraal, Prince Albert		0.125
SAM-PK-000769		SAM	Dinocephalia	Titanosuchidae	Titanosuchus		CFK 31-08-2015	Seekoegat, Zeekoegat 22, Prince Albert		0.0769231	0.0769231	0.0769231
SAM-PK-000772		SAM	Dinocephalia	Titanosuchidae	Titanosuchus	ferox	Sifelani Jirah 2019	Seekoegat, Zeekoegat 22, Prince Albert		0.0769231	0.0769231	0.0769231
SAM-PK-000773		SAM	Dinocephalia	Titanosuchidae	Titanosuchus	ferox	Sifelani Jirah 2019	Seekoegat, Zeekoegat 22, Prince Albert		0.0769231	0.0769231	0.0769231
SAM-PK-000918	918	SAM	Dinocephalia	Tapinocephalidae	Tapinocephalidae indet.		CFK 31-08-2015	Bokfontein 94, Prince Albert		0.0454545	0.0454545	0.0454545	0.0454545
SAM-PK-002759	2759	SAM	Dinocephalia	Titanosuchidae	Titanosuchus		CFK 31-08-2015	Platfontein, Varsch Fontein 27, Prince Albert		0.142857	0.142857	0.142857
SAM-PK-003012	3012	SAM	Dinocephalia	Tapinocephalidae	Struthiocephalus		CFK 31-08-2015	Abrahamskraal 29, Prince Albert		0.125
SAM-PK-003015		SAM	Dinocephalia	Tapinocephalidae	Tapinocephalidae indet.		CFK 31-08-2015				0.333333	0.333333	0.333333
SAM-PK-003719	3719	SAM	Dinocephalia	Tapinocephalidae	Struthiocephalus		CFK 31-08-2015	Abrahamskraal 29, Prince Albert		0.125
SAM-PK-004340	4340	SAM	Dinocephalia	Anteosauria	Anteosaurus		CFK 31-08-2015	Leeurivier, Rietfontein 306, Beaufort West		0.333333
SAM-PK-005014	5014	SAM	Dinocephalia	Titanosuchidae	Jonkeria	truculenta	CFK 31-08-2015; Sifelani Jirah 2019	Abrahamskraal 29, Prince Albert		0.125
SAM-PK-005607		SAM	Dinocephalia	Tapinocephalidae	Struthiocephaloides		CFK 31-08-2015	Lammerkraal, Lammerskraal 11, Beaufort West		0.25
SAM-PK-005621	5621	SAM	Dinocephalia	Anteosauria	Anteosaurus		CFK 31-08-2015	Leeurivier, Rietfontein 306, Beaufort West		0.333333
SAM-PK-009080	9080	SAM	Dinocephalia	Tapinocephalidae	Tapinocephalidae indet. (Delphinognathus)		CFK 31-08-2015; invalid taxon but have not seen				1
SAM-PK-009346	9346	SAM	Dinocephalia	Styracocephalidae	Styracocephalus	platyrhynchus	CFK 31-08-2015; Rubidge and Van den Heever 1997	Abrahamskraal 29, Prince Albert		0.125
SAM-PK-011296		SAM	Dinocephalia	Anteosauria	Anteosaurus		CFK 31-08-2015	Kruisriver, Kruis River 89, Sutherland		0.333333	0.333333	0.333333
SAM-PK-011300	11300	SAM	Dinocephalia	Tapinocephalidae	Tapinocephalidae indet. (Phocosaurus)		CFK 31-08-2015; invalid taxon but have not seen	Deesweez Fontein 51, Laingsburg		0.142857	0.142857	0.142857	0.142857
SAM-PK-011832		SAM	Dinocephalia	Tapinocephalidae	Tapinocephalidae indet.		CFK 31-08-2015	Lammerkraal, Lammerskraal 11, Beaufort West		0.25	0.25	0.25
SAM-PK-011881	11881	SAM	Dinocephalia	Titanosuchidae	Titanosuchus	ferox	Sifelani Jirah 2019	Bloukrans 31, Prince Albert		0.142857	0.142857	0.142857
SAM-PK-011947	11947	SAM	Dinocephalia	Tapinocephalidae	Struthionops		CFK 31-08-2015	Abrahamskraal 29, Prince Albert		0.125
SAM-PK-011988		SAM	Dinocephalia	Tapinocephalidae	Tapinocephalidae indet. (Phocosaurus)		CFK 31-08-2015; invalid taxon but have not seen					0.5	0.5
SAM-PK-011989	11989	SAM	Dinocephalia	Titanosuchidae	Titanosuchus	ferox	Sifelani Jirah 2019	Koedoeskop, Leeuwkraal 309, Beaufort West		0.25
SAM-PK-011997	11997	SAM	Dinocephalia	Tapinocephalidae	Tapinocephalus	atherstonei	CFK 31-08-2015	Koedoeskop, Leeuwkraal 309, Beaufort West		0.25
SAM-PK-012181		SAM	Dinocephalia	Styracocephalidae	Styracocephalus	platyrhynchus	CFK 31-08-2015; Rubidge and Van den Heever 1997	Vrederust, Dale Ajalon 322, Beaufort West		0.25
SAM-PK-012187		SAM	Dinocephalia	Styracocephalidae	Styracocephalus	platyrhynchus	CFK 31-08-2015; Rubidge and Van den Heever 1997	Skuilkraal, Meyerspoort 326, Beaufort West		0.25	0.25	0.25	0.25
SAM-PK-012215	12215	SAM	Dinocephalia	Styracocephalidae	Styracocephalus	platyrhynchus	CFK 31-08-2015; Rubidge and Van den Heever 1997	Koedoeskop, Leeuwkraal 309, Beaufort West		0.25
SAM-PK-K00364		SAM	Dinocephalia	Styracocephalidae	Styracocephalus	platyrhynchus	CFK 31-08-2015; Rubidge and Van den Heever 1997	Leokraal 353, Fraserburg			0.5	0.5
SAM-PK-K10888		SAM	Dinocephalia	Tapinocephalidae	Criocephalosaurus	sp.	Day et al, 2015	Putfontein 320, Beaufort West					1
TM 1484		TM	Dinocephalia	Tapinocephalidae	Mormosaurus		CFK 31-08-2015	Grantham, Hendriks Kraal 298, Beaufort West		0.5	0.5
TM 212		TM	Dinocephalia	Titanosuchidae	Jonkeria	truculenta	CFK 31-08-2015; Sifelani Jirah 2019	Abrahamskraal 29, Prince Albert		0.125
										Total dinocephalians:
										13.7167	9.28218	9.15718	7.27165	0	0	0
Collection number	Number	Collection	Higher Taxon	Family or Clade	Genus	Species	Source of ID	Locality		Upper Moordenaars	Lower Karelskraal	Upper Karelskraal	Lower Poortjie	Middle Poortjie	Upper Poortjie	Lower Hoedemaker
BP/1/7269	7269	ESI	Gorgonopsia	?	cf. Gorgonops		Christian Kammerer	Losberg1, Blaauwkrans 216, Beaufort West							1
AM 3751	3751	AM	Gorgonopsia	?	Eriphostoma		Kammerer et al 2015	Hottentots River 296, Beaufort West		0.166667	0.166667	0.166667
BP/1/7275	7275	ESI	Gorgonopsia	?	Eriphostoma		Kammerer et al, 2015	Brakleegte 297/Wolwehoek, Hendriks Kraal 298, Beaufort West							1
BP/1/7821	7821	ESI	Gorgonopsia	?	Eriphostoma	microdon	Christian Kammerer	Hendriks Kraal 298, Beaufort West			1
NMQR 3006	3006	NMB	Gorgonopsia	?	Eriphostoma		Kammerer et al 2015	Seekoegat, Zeekoegat 22, Prince Albert		0.333333
SAM-PK-002754	2754	SAM	Gorgonopsia	?	Eriphostoma		Kammerer et al 2015	Abrahamskraal 29, Prince Albert		0.125
SAM-PK-005598	5598	SAM	Gorgonopsia	?	Eriphostoma		Kammerer et al 2015	Abrahamskraal 29, Prince Albert		0.125
SAM-PK-011846	11846	SAM	Gorgonopsia	?	Eriphostoma		Kammerer et al 2015	Veldmans River 9, Prince Albert		0.166667
SAM-PK-011849	11849	SAM	Gorgonopsia	?	Eriphostoma		Kammerer et al 2015	Veldmans River 9, Prince Albert		0.166667
SAM-PK-K00208		SAM	Gorgonopsia	Gorgonopsidae	Eriphostoma		Kammerer et al 2015	Lammerkraal, Lammerskraal 11, Beaufort West		0.25
SAM-PK-K00230		SAM	Gorgonopsia	Gorgonopsidae	Eriphostoma		Kammerer et al 2015	Louisrust, Dale Ajalon 322, Beaufort West		0.25	0.25	0.25
SAM-PK-K11164		SAM	Gorgonopsia	Gorgonopsidae	Eriphostoma		Kammerer et al 2015	Amandelboom, Ryers Valley 401, Beaufort West							1
Unknown (attributed by Kammerer to RMS 1095)		CGS	Gorgonopsia	?	Eriphostoma		CFK 31-08-2015	Rietfontein 12, Prince Albert			0.5	0.5
SAM-PK-11490		SAM	Gorgonopsia	?	Gorgonopsian indet.		Kammerer et al 2015			0.5	0.5
SAM-PK-K10585		SAM	Gorgonopsia	?	Gorgonopsian indet.		CFK 31-08-2015					1
AM 3752	3752	AM	Gorgonopsia	?	Gorgonopsian indet.		Kammerer et al 2015	Hottentots River 296, Beaufort West		0.166667	0.166667	0.166667
										Total Guadalupian Gorgonopsia
										2.25	2.58333	2.08333	0	0	3	0
B16+A227	Number	Collection	Higher Taxon	Family or Clade	Genus	Species	Source of ID	Locality		Upper Moordenaars	Lower Karelskraal	Upper Karelskraal	Lower Poortjie	Middle Poortjie	Upper Poortjie	Lower Hoedemaker
AMNH 5515	5515	AMNH	Gorgonopsia	?	Gorgonops	torvus	Kammerer pers comm 2014	Beaufort West (commonage), Beaufort West							0.5	0.5
T35	35	CGS	Gorgonopsia	Gorgonopsidae	Gorgonops	torvus	Kammerer pers comm 2014	Rietfontein 122, Beaufort West							1
BP/1/7273	7273	ESI	Gorgonopsia	?	Gorgonops or Pachyrhinos		Christian Kammerer	Weltevrede Wes 172, Beaufort West						1
BSP 1934 VIII 10		BSP	Gorgonopsia	?	Gorgonops?		CFK 31-08-2015	La-de-da 178, Beaufort West						0.333333	0.333333	0.333333
BSP 1934 VIII 28		BSP	Gorgonopsia	?	Gorgonops?		CFK 31-08-2015	Lombardskraal 330, Beaufort West						0.333333	0.333333
BP/1/7569	7569	ESI	Gorgonopsia	?	Gorgonopsian incertae sedis		Christian Kammerer	Muggefontein, farm 404, Beaufort West							0.5	0.5
RMS 708		CGS	Gorgonopsia	?	Gorgonopsian indet.		Day; Kammerer 2015	Farm 509, Fraserburg							1
RS47	47	CGS	Gorgonopsia	?	Gorgonopsian indet.		CFK 31-08-2015									1
RD35		CGS	Gorgonopsia	?	Aelurosaurus	felinus	CFK 31-08-2015	Platfontein 28, Beaufort West							0.5	0.5
From Day et al (2018) for lower Hoedemaker extra																4
										Total Lopingian Gorgonopsia
										0	0	0	0	1.66667	4.16667	6.83333
Collection number	Number	Collection	Higher Taxon	Family or Clade	Genus	Species	Source of ID	Locality		Upper Moordenaars	Lower Karelskraal	Upper Karelskraal	Lower Poortjie	Middle Poortjie	Upper Poortjie	Lower Hoedemaker
15/1/A6 - Uncatalogued specimen		ESI	Dicynodontia	Endothiodontidae	Endothiodon		M Day	Spinnekopkraal 466, Fraserburg							1
AM 2821	2821	AM	Dicynodontia	Pylaecephalidae	Diictodon		Frobisch sheet 2015	Rietfontein 12, Prince Albert		0.0909091	0.0909091	0.0909091	0.0909091
AM 3744	3744	AM	Dicynodontia	Cryptodontia	Tropidostoma		CFK 31-08-2015	Hottentots River 296, Beaufort West								1
AMNH 5579	5579	AMNH	Dicynodontia	Basal Dicynodontia	Pristerodon		Kammerer pers comm 2015	"Beaufort West" no locality		0.166667	0.166667	0.166667	0.166667	0.166667	0.166667
B16	16	CGS	Dicynodontia	Pylaecephalidae	Diictodon		Frobisch sheet 2015	Drie Bosch Kuil 142, Beaufort West				0.5	0.5
B17	17	CGS	Dicynodontia	?	Unidentified		Frobisch sheet 2015	Drie Bosch Kuil 142, Beaufort West				0.25	0.25	0.25	0.25
BP/1/2234	2234	ESI	Dicynodontia	Pylaecephalidae	Robertia	broomiana	Kammerer ESI catalogue	Kleinwaterval, Spreeuw Fontein 26, Prince Albert		0.0833333	0.0833333
BP/1/2235	2235	ESI	Dicynodontia	Pylaecephalidae	Robertia	broomiana	Kammerer ESI catalogue	Kleinwaterval, Spreeuw Fontein 26, Prince Albert		0.0833333	0.0833333
BP/1/273	273	ESI	Dicynodontia	Pylaecephalidae	Diictodon		Frobisch sheet 2015	Antjiesfontein, Leeukraal 24, Prince Albert		0.125	0.125
BP/1/274	274	ESI	Dicynodontia	Pylaecephalidae	Diictodon		Frobisch sheet 2015	Antjiesfontein, Leeukraal 24, Prince Albert		0.125	0.125
BP/1/277	277	ESI	Dicynodontia	Pylaecephalidae	Diictodon		Frobisch sheet 2015	Antjiesfontein, Leeukraal 24, Prince Albert		0.125	0.125
BP/1/279	279	ESI	Dicynodontia	Pylaecephalidae	Diictodon		Frobisch sheet 2015	Antjiesfontein, Leeukraal 24, Prince Albert		0.125	0.125
BP/1/280	280	ESI	Dicynodontia	Pylaecephalidae	Diictodon		Frobisch sheet 2015	Antjiesfontein, Leeukraal 24, Prince Albert		0.125	0.125
BP/1/282	282	ESI	Dicynodontia	Pylaecephalidae	Diictodon		Frobisch sheet 2015	Antjiesfontein, Leeukraal 24, Prince Albert		0.125	0.125
BP/1/283	283	ESI	Dicynodontia	Pylaecephalidae	Diictodon		Frobisch sheet 2015	Antjiesfontein, Leeukraal 24, Prince Albert		0.125	0.125
BP/1/285	285	ESI	Dicynodontia	Pylaecephalidae	Diictodon		Frobisch sheet 2015	Antjiesfontein, Leeukraal 24, Prince Albert		0.125	0.125
BP/1/286	286	ESI	Dicynodontia	Pylaecephalidae	Robertia	broomiana	Frobisch sheet 2015	Antjiesfontein, Leeukraal 24, Prince Albert		0.125	0.125
BP/1/287	287	ESI	Dicynodontia	Pylaecephalidae	Diictodon		Kammerer	Antjiesfontein, Leeukraal 24, Prince Albert		0.125	0.125
BP/1/288	288	ESI	Dicynodontia	Pylaecephalidae	Diictodon		Frobisch sheet 2015	Antjiesfontein, Leeukraal 24, Prince Albert		0.125	0.125
BP/1/289	289	ESI	Dicynodontia	Pylaecephalidae	Robertia	broomiana	Frobisch sheet 2015	Antjiesfontein, Leeukraal 24, Prince Albert		0.125	0.125
BP/1/290	290	ESI	Dicynodontia	Pylaecephalidae	Diictodon		Frobisch sheet 2015	Antjiesfontein, Leeukraal 24, Prince Albert		0.125	0.125
BP/1/291	291	ESI	Dicynodontia	Pylaecephalidae	Diictodon		Frobisch sheet 2015	Antjiesfontein, Leeukraal 24, Prince Albert		0.125	0.125
BP/1/292	292	ESI	Dicynodontia	Pylaecephalidae	Robertia	broomiana	Frobisch sheet 2015	Antjiesfontein, Leeukraal 24, Prince Albert		0.125	0.125
BP/1/293	293	ESI	Dicynodontia	Pylaecephalidae	Diictodon		Frobisch sheet 2015	Antjiesfontein, Leeukraal 24, Prince Albert		0.125	0.125
BP/1/294	294	ESI	Dicynodontia	Pylaecephalidae	Diictodon		Frobisch sheet 2015	Kleinwaterval, Spreeuw Fontein 26, Prince Albert		0.0833333	0.0833333
BP/1/295	295	ESI	Dicynodontia	Pylaecephalidae	Diictodon		Frobisch sheet 2015	Kleinwaterval, Spreeuw Fontein 26, Prince Albert		0.0833333	0.0833333
BP/1/296	296	ESI	Dicynodontia	Pylaecephalidae	Diictodon		Frobisch sheet 2015	Kleinwaterval, Spreeuw Fontein 26, Prince Albert		0.0833333	0.0833333
BP/1/315	315	ESI	Dicynodontia	?	Unidentified		Frobisch sheet 2015							0.25	0.25
BP/1/5038	5038	ESI	Dicynodontia	Pylaecephalidae	Diictodon		Ken Angielczyk	Honing Leegte 313, Beaufort West		0.333333
BP/1/6959	6959	ESI	Dicynodontia		Dicynodont indet.		M Day 2016	Bloukrans 31, Prince Albert		1
BP/1/6960	6960	ESI	Dicynodontia		Dicynodont indet.		M Day 2016	Bloukrans 31, Prince Albert		1
BP/1/6961	6961	ESI	Dicynodontia		Dicynodont indet.		M Day 2016	Bloukrans 31, Prince Albert		1
BP/1/6962	6962	ESI	Dicynodontia		Dicynodont indet.		M Day 2016	Bloukrans 31, Prince Albert		1
BP/1/6963	6963	ESI	Dicynodontia		Dicynodont indet.		M Day 2016	Bloukrans 31, Prince Albert		1
BP/1/6964	6964	ESI	Dicynodontia		Dicynodont indet.		M Day 2016	Bloukrans 31, Prince Albert		1
BP/1/6967	6967	ESI	Dicynodontia	Pylaecephalidae	Robertia?		Rubidge ESI catalogue	Bloukrans 31, Prince Albert		1
BP/1/6968	6968	ESI	Dicynodontia		Dicynodont indet.		M Day 2016	Bloukrans 31, Prince Albert		1
BP/1/6989	6989	ESI	Dicynodontia	Pylaecephalidae	Eosimops	newtoni	Angielczyk ESI catalogue	Baviaans Drift 36, Sutherland		0.333333
BP/1/6990	6990	ESI	Dicynodontia	Pylaecephalidae	Diictodon		Angielczyk ESI catalogue	Celeryfontein, Sellery Fontein 426, Fraserburg				1
BP/1/6991	6991	ESI	Dicynodontia	Pylaecephalidae	Diictodon or Prosictodon		M Day 2016	Celeryfontein, Sellery Fontein 426, Fraserburg				1
BP/1/7040	7040	ESI	Dicynodontia	Pylaecephalidae	Diictodon or Prosictodon		Angielczyk ESI catalogue	Jakkalsfontein, Ratelfontein 74, Prince Albert		0.142857
BP/1/7050	7050	ESI	Dicynodontia	Pylaecephalidae	Robertia	broomiana	J Frobisch	Jakkalsfontein, Ratelfontein 74, Prince Albert		0.142857
BP/1/7077	7077	ESI	Dicynodontia	Pylaecephalidae	Diictodon		Angielczyk ESI catalogue	Goeiemoed 90, Prince Albert		0.125	0.125
BP/1/7087	7087	ESI	Dicynodontia	Pylaecephalidae	Diictodon?		Angielczyk ESI catalogue	Springfontein, Rondom 247, Baufort West					1
BP/1/7088	7088	ESI	Dicynodontia	Pylaecephalidae	Diictodon?		Angielczyk ESI catalogue	Springfontein, Rondom 247, Baufort West					1
BP/1/7089	7089	ESI	Dicynodontia	Pylaecephalidae	Diictodon		Angielczyk ESI catalogue	Springfontein, Rondom 247, Baufort West					1
BP/1/7096	7096	ESI	Dicynodontia	Pylaecephalidae	Prosictodon		Angielczyk ESI catalogue	Celeryfontein, Sellery Fontein 426, Fraserburg				1
BP/1/7101	7101	ESI	Dicynodontia	Pylaecephalidae	Diictodon		Angielczyk ESI catalogue	Overse Fontein 249, Beaufort West					1
BP/1/7103	7103	ESI	Dicynodontia	Pylaecephalidae	Robertia or Eosimops		Angielczyk ESI catalogue	Goeiemoed 90, Prince Albert		0.125	0.125
BP/1/7105	7105	ESI	Dicynodontia	Pylaecephalidae	Diictodon		Angielczyk ESI catalogue	Springfontein, Rondom 247, Baufort West				1
BP/1/7148	7148	ESI	Dicynodontia	Basal Dicynodontia	Pristerodon	mackayi	Angielczyk ESI catalogue	Prinshof, Basters Berg 35, Sutherland		1
BP/1/7163	7163	ESI	Dicynodontia	Pylaecephalidae	Robertia	broomiana	CFK 31-08-2015	Farm just outside Sutherland (probably Klipkraal 82), Sutherland		0.5
BP/1/7164	7164	ESI	Dicynodontia	Pylaecephalidae	Eosimops	newtoni	CFK 31-08-2015	Farm just outside Sutherland (probably Klipkraal 82), Sutherland		0.5
BP/1/7171	7171	ESI	Dicynodontia	Pylaecephalidae	Diictodon		M Day 2016	Muggefontein, farm 404, Beaufort West								1
BP/1/7188	7188	ESI	Dicynodontia	Pylaecephalidae	Robertia	broomiana	Angielczyk ESI catalogue	Palmietfontein 42, Sutherland		0.333333	0.333333	0.333333
BP/1/7190	7190	ESI	Dicynodontia	Pylaecephalidae	Prosictodon		Angielczyk ESI catalogue	Goeiemoed 90, Prince Albert		0.125	0.125
BP/1/7191	7191	ESI	Dicynodontia	Pylaecephalidae	Diictodon?		Angielczyk ESI catalogue	Puntkraal, Uitvlug 90, Sutherland					1
BP/1/7193	7193	ESI	Dicynodontia	Basal Dicynodontia	Pristerodon?		CFK 31-08-2015	Puntkraal, Uitvlugt 90, Sutherland					1
BP/1/7194	7194	ESI	Dicynodontia	Basal Dicynodontia	Pristerodon		Angielczyk ESI catalogue	Puntkraal, Uitvlugt 90, Sutherland					1
BP/1/7195	7195	ESI	Dicynodontia	Basal Dicynodontia	Pristerodon		CFK 31-08-2015	Puntkraal, Uitvlugt 90, Sutherland					1
BP/1/7196	7196	ESI	Dicynodontia	Basal Dicynodontia	Pristerodon?		Rubidge ESI catalogue	Puntkraal, Uitvlugt 90, Sutherland					1
BP/1/7201	7201	ESI	Dicynodontia	Pylaecephalidae	Diictodon		Angielczyk ESI catalogue	Puntkraal, Uitvlug 90, Sutherland				1
BP/1/7202	7202	ESI	Dicynodontia	Pylaecephalidae	Robertia or Eosimops		K Angielczyk	Goeiemoed 90, Prince Albert		0.125	0.125
BP/1/7204	7204	ESI	Dicynodontia	Basal Dicynodontia	Pristerodon		Angielczyk ESI catalogue	Puntkraal, Uitvlugt 90, Sutherland					1
BP/1/7205	7205	ESI	Dicynodontia	Basal Dicynodontia	Pristerodon		Angielczyk ESI catalogue	Puntkraal, Uitvlugt 90, Sutherland					1
BP/1/7206	7206	ESI	Dicynodontia	Basal Dicynodontia	Pristerodon		CFK 31-08-2015	Puntkraal, Uitvlugt 90, Sutherland					1
BP/1/7207	7207	ESI	Dicynodontia	Pylaecephalidae	Robertia	broomiana	Angielczyk ESI catalogue	Goeiemoed 90, Prince Albert		0.125	0.125
BP/1/7209	7209	ESI	Dicynodontia	Pylaecephalidae	Diictodon		CFK 31-08-2015	Puntkraal, Uitvlug 90, Sutherland					1
BP/1/7210	7210	ESI	Dicynodontia	Pylaecephalidae	Diictodon		CFK 31-08-2015	Puntkraal, Uitvlug 90, Sutherland					1
BP/1/7211	7211	ESI	Dicynodontia	Pylaecephalidae	Diictodon		CFK 31-08-2015	Puntkraal, Uitvlug 90, Sutherland					1
BP/1/7226	7226	ESI	Dicynodontia	Pylaecephalidae	Diictodon		J Frobisch	Puntkraal, Uitvlug 90, Sutherland					1
BP/1/7228	7228	ESI	Dicynodontia	Pylaecephalidae	Diictodon?		M Day	Prinshof, Bastards Berg 35, Sutherland				1
BP/1/7229	7229	ESI	Dicynodontia	Pylaecephalidae	Diictodon		M Day; J Frobisch	Puntkraal, Uitvlug 90, Sutherland					1
BP/1/7230	7230	ESI	Dicynodontia	Basal Dicynodontia	Eosimops	newtoni	Ken Angielczyk	Prinshof, Bastards Berg 35, Sutherland				1
BP/1/7231	7231	ESI	Dicynodontia	Basal Dicynodontia	Pristerodon	mackayi	Ken Angielczyk	Puntkraal, Uitvlug 90, Sutherland					1
BP/1/7232	7232	ESI	Dicynodontia	Pylaecephalidae	Diictodon		M Day; J Frobisch	Puntkraal, Uitvlug 90, Sutherland			1
BP/1/7233	7233	ESI	Dicynodontia	Pylaecephalidae	Diictodon		J Frobisch	Puntkraal, Uitvlug 90, Sutherland						1
BP/1/7237	7237	ESI	Dicynodontia	Pylaecephalidae	Diictodon?		M Day	Puntkraal, Uitvlug 90, Sutherland				1
BP/1/7250	7250	ESI	Dicynodontia	Endothiodontidae	Endothiodon		M Day 2016	Brakleegte 297/Wolwehoek, Hendriks Kraal 298, Beaufort West							1
BP/1/7251	7251	ESI	Dicynodontia		Dicynodontia cf. Endothiodon		M Day 2016	Brakleegte 297/Wolwehoek, Hendriks Kraal 298, Beaufort West						1
BP/1/7253	7253	ESI	Dicynodontia	Endothiodontidae	Endothiodon?		M Day 2016	Weltevrede Wes 172, Beaufort West					1
BP/1/7254	7254	ESI	Dicynodontia	Endothiodontidae	Endothiodon		M Day 2016	Brakleegte 297/Wolwehoek, Hendriks Kraal 298, Beaufort West						1
BP/1/7262	7262	ESI	Dicynodontia	Pylaecephalidae	Diictodon		Ken Angielczyk	Losberg1, Blaauwkrans 216, Beaufort West						1
BP/1/7264	7264	ESI	Dicynodontia		Dicynodont indet.; medium size		M Day 2016	Brakleegte 297/Wolwehoek, Hendriks Kraal 298, Beaufort West						1
BP/1/7267	7267	ESI	Dicynodontia	Endothiodontidae	Endothiodon		M Day 2016	Losberg1, Blaauwkrans 216, Beaufort West						1
BP/1/7270	7270	ESI	Dicynodontia	Basal Dicynodontia	Pristerodon		Frobisch	Losberg1, Blaauwkrans 216, Beaufort West						1
BP/1/7271	7271	ESI	Dicynodontia	Basal Dicynodontia	Pristerodon		M Day 2016	Weltevrede Wes 172, Beaufort West					1
BP/1/7278	7278	ESI	Dicynodontia	Pylaecephalidae	Diictodon?		R Smith	Losberg1, Blaauwkrans 216, Beaufort West						1
BP/1/7279	7279	ESI	Dicynodontia	Endothiodontidae	Endothiodon		M Day 2016	Weltevrede Wes 172, Beaufort West					1
BP/1/7281	7281	ESI	Dicynodontia		Dicyndont indet.		M Day 2016	Brakleegte 297/Wolwehoek, Hendriks Kraal 298, Beaufort West							1
BP/1/7282	7282	ESI	Dicynodontia	Pylaecephalidae	Diictodon		Frobisch	Brakleegte 297/Wolwehoek, Hendriks Kraal 298, Beaufort West					1
BP/1/7283	7283	ESI	Dicynodontia	Endothiodontidae	Endothiodon?		M Day 2016	Weltevrede Wes 172, Beaufort West					1
BP/1/7286	7286	ESI	Dicynodontia	Pylaecephalidae	Diictodon		M Day 2016	Brakleegte 297/Wolwehoek, Hendriks Kraal 298, Beaufort West						1
BP/1/7288	7288	ESI	Dicynodontia	Pylaecephalidae	Diictodon		Ken Angielczyk	Brakleegte 297/Wolwehoek, Hendriks Kraal 298, Beaufort West		1
BP/1/7296	7296	ESI	Dicynodontia	Basal Dicynodontia	Pristerodon		Frobisch	Losberg1, Blaauwkrans 216, Beaufort West						1
BP/1/7297	7297	ESI	Dicynodontia	Basal Dicynodontia	Pristerodon		Frobisch	Losberg1, Blaauwkrans 216, Beaufort West							1
BP/1/7298	7298	ESI	Dicynodontia	Pylaecephalidae	cf. Emydops		Ken Angielczyk	Losberg1, Blaauwkrans 216, Beaufort West						1
BP/1/7299	7299	ESI	Dicynodontia	Pylaecephalidae	Diictodon		M Day 2016	Weltevrede Wes 172, Beaufort West					1
BP/1/7300	7300	ESI	Dicynodontia	Basal Dicynodontia	Pristerodon		M Day 2016	Weltevrede Wes 172, Beaufort West					1
BP/1/7302	7302	ESI	Dicynodontia	Pylaecephalidae	Diictodon		Frobisch	Brakleegte 297/Wolwehoek, Hendriks Kraal 298, Beaufort West				1
BP/1/7303	7303	ESI	Dicynodontia	Pylaecephalidae	Diictodon		M Day 2016	Brakleegte 297/Wolwehoek, Hendriks Kraal 298, Beaufort West					1
BP/1/7304	7304	ESI	Dicynodontia	Pylaecephalidae	cf. Diictodon		M Day 2016	Weltevrede Wes 172, Beaufort West					1
BP/1/7305	7305	ESI	Dicynodontia	Pylaecephalidae	cf. Diictodon		M Day 2016	Brakleegte 297/Wolwehoek, Hendriks Kraal 298, Beaufort West					1
BP/1/7306	7306	ESI	Dicynodontia	Pylaecephalidae	Pristerodon?		Ken Angielczyk	Losberg1, Blaauwkrans 216, Beaufort West							1
BP/1/7308	7308	ESI	Dicynodontia	Pylaecephalidae	Diictodon		Ken Angielczyk	Losberg1, Blaauwkrans 216, Beaufort West							1
BP/1/7309	7309	ESI	Dicynodontia	Pylaecephalidae	Diictodon		Frobisch	Weltevrede Wes 172, Beaufort West					1
BP/1/7310	7310	ESI	Dicynodontia	Pylaecephalidae	Diictodon?		Ken Angielczyk	Losberg1, Blaauwkrans 216, Beaufort West						1
BP/1/7311	7311	ESI	Dicynodontia	Pylaecephalidae	Diictodon		Ken Angielczyk	Brakleegte 297/Wolwehoek, Hendriks Kraal 298, Beaufort West					1
BP/1/7312	7312	ESI	Dicynodontia	Pylaecephalidae	Dicynodont indet.		M Day 2016	Weltevrede Wes 172, Beaufort West					1
BP/1/7313	7313	ESI	Dicynodontia	Pylaecephalidae	cf. Diictodon		M Day 2016	Brakleegte 297/Wolwehoek, Hendriks Kraal 298, Beaufort West					1
BP/1/7314	7314	ESI	Dicynodontia	Pylaecephalidae	Pristerodon?		Ken Angielczyk	Losberg1, Blaauwkrans 216, Beaufort West							1
BP/1/7315	7315	ESI	Dicynodontia	Pylaecephalidae	Diictodon?		Rubidge ESI catalogue	Losberg1, Blaauwkrans 216, Beaufort West						1
BP/1/7316	7316	ESI	Dicynodontia	Pylaecephalidae	cf. Diictodon		M Day 2016	Brakleegte 297/Wolwehoek, Hendriks Kraal 298, Beaufort West					1
BP/1/7317	7317	ESI	Dicynodontia	Pylaecephalidae	cf. Diictodon		M Day 2016	Losberg1, Blaauwkrans 216, Beaufort West						1
BP/1/7318	7318	ESI	Dicynodontia	Pylaecephalidae	cf. Diictodon		Ken Angielczyk	Brakleegte 297/Wolwehoek, Hendriks Kraal 298, Beaufort West				1
BP/1/7319	7319	ESI	Dicynodontia	Pylaecephalidae	Dicynodont indet.		M Day 2016	Brakleegte 297/Wolwehoek, Hendriks Kraal 298, Beaufort West			1
BP/1/7320	7320	ESI	Dicynodontia	Pylaecephalidae	cf. Pristerodon		K Angielczyk 2018	Losberg1, Blaauwkrans 216, Beaufort West						1
BP/1/7321	7321	ESI	Dicynodontia	Pylaecephalidae	cf. Diictodon		M Day 2016	Brakleegte 297/Wolwehoek, Hendriks Kraal 298, Beaufort West				1
BP/1/7322	7322	ESI	Dicynodontia	Pylaecephalidae	cf. Diictodon		M Day 2016	Brakleegte 297/Wolwehoek, Hendriks Kraal 298, Beaufort West				1
BP/1/7323	7323	ESI	Dicynodontia	Pylaecephalidae	Diictodon		M Day 2016	Brakleegte 297/Wolwehoek, Hendriks Kraal 298, Beaufort West					1
BP/1/7347	7347	ESI	Dicynodontia	Pylaecephalidae	Diictodon		Frobisch	Brakleegte 297/Wolwehoek, Hendriks Kraal 298, Beaufort West						1
BP/1/7348	7348	ESI	Dicynodontia	Basal Dicynodontia	Pristerodon		Frobisch	Losberg1, Blaauwkrans 216, Beaufort West							1
BP/1/7349	7349	ESI	Dicynodontia	Endothiodontidae	Endothiodon		M Day 2016	Weltevrede Wes 172, Beaufort West					1
BP/1/7350	7350	ESI	Dicynodontia	Endothiodontidae	Endothiodon		M Day 2016	Weltevrede Wes 172, Beaufort West					1
BP/1/7354	7354	ESI	Dicynodontia	Pylaecephalidae	Diictodon		M Day 2016	Losberg1, Blaauwkrans 216, Beaufort West						1
BP/1/7355	7355	ESI	Dicynodontia	Pylaecephalidae	Diictodon		M Day 2016	Losberg1, Blaauwkrans 216, Beaufort West						1
BP/1/7356	7356	ESI	Dicynodontia	Endothiodontidae	Endothiodon		M Day 2016	Losberg1, Blaauwkrans 216, Beaufort West							1
BP/1/7357	7357	ESI	Dicynodontia	Pylaecephalidae	Diictodon		M Day 2016	Brakleegte 297/Wolwehoek, Hendriks Kraal 298, Beaufort West		1
BP/1/7369	7369	ESI	Dicynodontia	Pylaecephalidae	Diictodon		M Day 2016	Brakleegte 297/Wolwehoek, Hendriks Kraal 298, Beaufort West			1
BP/1/7370	7370	ESI	Dicynodontia	Pylaecephalidae	cf. Diictodon		Ken Angielczyk	Losberg1, Blaauwkrans 216, Beaufort West						1
BP/1/7374	7374	ESI	Dicynodontia	?	Dicynodont indet.		M Day 2016	Weltevrede Wes 172, Beaufort West					1
BP/1/7375	7375	ESI	Dicynodontia	?	Dicynodont indet.		M Day 2016	Weltevrede Wes 172, Beaufort West					1
BP/1/7376	7376	ESI	Dicynodontia	Endothiodontidae	Endothiodon?		M Day 2016	Puntkraal, Uitvlug 90, Sutherland						1
BP/1/7379	7379	ESI	Dicynodontia	Endothiodontidae	Endothiodon		M Day 2016	Puntkraal, Uitvlug 90, Sutherland						1
BP/1/7381	7381	ESI	Dicynodontia	Pylaecephalidae	cf. Diictodon		Ken Angielczyk	Brakleegte 297/Wolwehoek, Hendriks Kraal 298, Beaufort West					1
BP/1/7382	7382	ESI	Dicynodontia	Pylaecephalidae	cf. pylaecephalid		Ken Angielczyk	Losberg1, Blaauwkrans 216, Beaufort West							1
BP/1/7383	7383	ESI	Dicynodontia	?	Indet.		M Day 2016	Weltevrede Wes 172, Beaufort West					1
BP/1/7384	7384	ESI	Dicynodontia	Pylaecephalidae	cf. Diictodon		M Day 2016	Weltevrede Wes 172, Beaufort West					1
BP/1/7385	7385	ESI	Dicynodontia	Pylaecephalidae	cf. Diictodon		Ken Angielczyk	Losberg1, Blaauwkrans 216, Beaufort West						1
BP/1/7386	7386	ESI	Dicynodontia	Pylaecephalidae	cf. Diictodon		M Day 2016	Brakleegte 297/Wolwehoek, Hendriks Kraal 298, Beaufort West			1
BP/1/7388	7388	ESI	Dicynodontia	Pylaecephalidae	Pylaecephalid indet.		M Day 2016	Weltevrede Wes 172, Beaufort West					1
BP/1/7394	7394	ESI	Dicynodontia	Basal Dicynodontia	cf. Pristerodon		M Day 2016	Losberg1, Blaauwkrans 216, Beaufort West						1
BP/1/7399	7399	ESI	Dicynodontia	Pylaecephalidae	cf. Diictodon		Ken Angielczyk	Losberg1, Blaauwkrans 216, Beaufort West						1
BP/1/7400	7400	ESI	Dicynodontia	Pylaecephalidae	Dicynodont indet.		Ken Angielczyk	Losberg1, Blaauwkrans 216, Beaufort West							1
BP/1/7402	7402	ESI	Dicynodontia	Pylaecephalidae	Diictodon		Rubidge ESI catalogue	Brakleegte 297/Wolwehoek, Hendriks Kraal 298, Beaufort West					1
BP/1/7403	7403	ESI	Dicynodontia		Indet.		M Day 2016	Weltevrede Wes 172, Beaufort West					1
BP/1/7406	7406	ESI	Dicynodontia	Pylaecephalidae	Diictodon		Ken Angielczyk	Losberg1, Blaauwkrans 216, Beaufort West						1
BP/1/7407	7407	ESI	Dicynodontia	Pylaecephalidae	Diictodon		M Day 2016	Brakleegte 297/Wolwehoek, Hendriks Kraal 298, Beaufort West					1
BP/1/7459	7459	ESI	Dicynodontia	Pylaecephalidae	Diictodon		M Day 2016	Muggefontein, farm 404, Beaufort West								1
BP/1/7464	7464	ESI	Dicynodontia	Pylaecephalidae	Diictodon		M Day 2016	Losberg1, Blaauwkrans 216, Beaufort West						1
BP/1/7466	7466	ESI	Dicynodontia	Pylaecephalidae	cf. Diictodon		M Day 2016	Weltevrede Wes 172, Beaufort West					1
BP/1/7467	7467	ESI	Dicynodontia	Pylaecephalidae	Diictodon		M Day 2016	Losberg1, Blaauwkrans 216, Beaufort West						1
BP/1/7468	7468	ESI	Dicynodontia	Pylaecephalidae	Diictodon		M Day 2016	Weltevrede Wes 172, Beaufort West					1
BP/1/7470	7470	ESI	Dicynodontia	Pylaecephalidae	Diictodon		M Day 2016	Weltevrede Wes 172, Beaufort West					1
BP/1/7471	7471	ESI	Dicynodontia	Pylaecephalidae	cf. Diictodon		M Day 2016	Losberg1, Blaauwkrans 216, Beaufort West						1
BP/1/7472	7472	ESI	Dicynodontia	Pylaecephalidae	Diictodon		M Day 2016	Losberg1, Blaauwkrans 216, Beaufort West						1
BP/1/7477	7477	ESI	Dicynodontia	Pylaecephalidae	cf. Diictodon		M Day 2016	Muggefontein, farm 404, Beaufort West								1
BP/1/7478	7478	ESI	Dicynodontia	Pylaecephalidae	Dicynodont indet		M Day 2016	Muggefontein, farm 404, Beaufort West							1
BP/1/7479	7479	ESI	Dicynodontia	Pylaecephalidae	Diictodon		M Day 2016	Muggefontein, farm 404, Beaufort West								1
BP/1/7480	7480	ESI	Dicynodontia	Pylaecephalidae	cf. Diictodon		M Day 2016	Muggefontein, farm 404, Beaufort West				1
BP/1/7481	7481	ESI	Dicynodontia	Pylaecephalidae	Diictodon		M Day 2016	Muggefontein, farm 404, Beaufort West								1
BP/1/7482	7482	ESI	Dicynodontia	Pylaecephalidae	cf. Diictodon		M Day 2016	Muggefontein, farm 404, Beaufort West				1
BP/1/7483	7483	ESI	Dicynodontia	Pylaecephalidae	Dicynodont indet		M Day 2016	Maritzhoek, Slingersfontein 232, Beaufort West		1
BP/1/7484	7484	ESI	Dicynodontia	Pylaecephalidae	Diictodon		M Day 2016	Muggefontein, farm 404, Beaufort West								1
BP/1/7485	7485	ESI	Dicynodontia	Pylaecephalidae	Diictodon		M Day 2016	Muggefontein, farm 404, Beaufort West					1
BP/1/7486	7486	ESI	Dicynodontia	Pylaecephalidae	Diictodon		M Day 2016	Muggefontein, farm 404, Beaufort West								1
BP/1/7487	7487	ESI	Dicynodontia	Pylaecephalidae	cf. Diictodon		M Day 2016	Muggefontein, farm 404, Beaufort West						1
BP/1/7488	7488	ESI	Dicynodontia	Pylaecephalidae	Diictodon		M Day 2016	Muggefontein, farm 404, Beaufort West								1
BP/1/7489	7489	ESI	Dicynodontia	Pylaecephalidae	Diictodon		M Day 2016	Muggefontein, farm 404, Beaufort West						1
BP/1/7490	7490	ESI	Dicynodontia	Pylaecephalidae	cf. Diictodon		M Day 2016	Muggefontein, farm 404, Beaufort West								1
BP/1/7491	7491	ESI	Dicynodontia	Pylaecephalidae	Diictodon		B. Rubidge	Muggefontein, farm 404, Beaufort West				1
BP/1/7494	7494	ESI	Dicynodontia	?	Dicynodont indet		Ken Angielczyk	Hendriks Kraal 298, Beaufort West					1
BP/1/7496	7496	ESI	Dicynodontia	Pylaecephalidae	Diictodon		M Day 2016	Muggefontein, farm 404, Beaufort West								1
BP/1/7497	7497	ESI	Dicynodontia	Pylaecephalidae	Diictodon		M Day 2016	Muggefontein, farm 404, Beaufort West								1
BP/1/7498	7498	ESI	Dicynodontia	Pylaecephalidae	cf. Diictodon		M Day 2016	Muggefontein, farm 404, Beaufort West				1
BP/1/7499	7499	ESI	Dicynodontia	Pylaecephalidae	Diictodon or Prosictodon		M Day 2016	Muggefontein, farm 404, Beaufort West							1
BP/1/7500	7500	ESI	Dicynodontia	Pylaecephalidae	Dicynodont indet		M Day 2016	Muggefontein, farm 404, Beaufort West								1
BP/1/7501	7501	ESI	Dicynodontia	Pylaecephalidae	Diictodon		M Day 2016	Muggefontein, farm 404, Beaufort West								1
BP/1/7502	7502	ESI	Dicynodontia	Pylaecephalidae	Diictodon		M Day 2016	Muggefontein, farm 404, Beaufort West						1
BP/1/7503	7503	ESI	Dicynodontia	Pylaecephalidae	Diictodon		B. Rubidge	Muggefontein, farm 404, Beaufort West								1
BP/1/7504	7504	ESI	Dicynodontia	Pylaecephalidae	Diictodon		M Day 2016	Muggefontein, farm 404, Beaufort West								1
BP/1/7505	7505	ESI	Dicynodontia	Pylaecephalidae	Diictodon		M Day 2016	Muggefontein, farm 404, Beaufort West								1
BP/1/7506	7506	ESI	Dicynodontia	Pylaecephalidae	Dicynodont indet		M Day 2016	Muggefontein, farm 404, Beaufort West							1
BP/1/7507	7507	ESI	Dicynodontia	Pylaecephalidae	Pylaecephalid indet.		M Day 2016	Muggefontein, farm 404, Beaufort West							1
BP/1/7508	7508	ESI	Dicynodontia	Pylaecephalidae	cf. Diictodon		M Day 2016	Muggefontein, farm 404, Beaufort West						1
BP/1/7509	7509	ESI	Dicynodontia	Pylaecephalidae	Diictodon		Ken Angielczyk	Muggefontein, farm 404, Beaufort West					1
BP/1/7510	7510	ESI	Dicynodontia	Pylaecephalidae	Dicynodont indet		M Day 2016	Muggefontein, farm 404, Beaufort West					1
BP/1/7511	7511	ESI	Dicynodontia	Pylaecephalidae	cf. Diictodon		M Day 2016	Muggefontein, farm 404, Beaufort West								1
BP/1/7512	7512	ESI	Dicynodontia	Pylaecephalidae	Diictodon		M Day 2016	Muggefontein, farm 404, Beaufort West							1
BP/1/7513	7513	ESI	Dicynodontia	Pylaecephalidae	Diictodon		B. Rubidge	Muggefontein, farm 404, Beaufort West								1
BP/1/7515	7515	ESI	Dicynodontia	Pylaecephalidae	cf. Diictodon		M Day 2016	Muggefontein, farm 404, Beaufort West								1
BP/1/7516	7516	ESI	Dicynodontia	Pylaecephalidae	Diictodon		B. Rubidge	Muggefontein, farm 404, Beaufort West								1
BP/1/7517	7517	ESI	Dicynodontia	Pylaecephalidae	Diictodon		M Day 2016	Muggefontein, farm 404, Beaufort West								1
BP/1/7518	7518	ESI	Dicynodontia	Pylaecephalidae	Diictodon		M Day 2016	Muggefontein, farm 404, Beaufort West								1
BP/1/7519	7519	ESI	Dicynodontia	Pylaecephalidae	Diictodon		M Day 2016	Muggefontein, farm 404, Beaufort West								1
BP/1/7520	7520	ESI	Dicynodontia	Pylaecephalidae	Diictodon		M Day 2016	Muggefontein, farm 404, Beaufort West								1
BP/1/7521	7521	ESI	Dicynodontia	Pylaecephalidae	Diictodon		M Day 2016	Muggefontein, farm 404, Beaufort West						1
BP/1/7522	7522	ESI	Dicynodontia	Pylaecephalidae	Diictodon		M Day 2016	Muggefontein, farm 404, Beaufort West								1
BP/1/7523	7523	ESI	Dicynodontia	Pylaecephalidae	Diictodon		M Day 2016	Muggefontein, farm 404, Beaufort West					1
BP/1/7524	7524	ESI	Dicynodontia	Pylaecephalidae	Diictodon		M Day 2016	Muggefontein, farm 404, Beaufort West								1
BP/1/7525	7525	ESI	Dicynodontia	Pylaecephalidae	cf. Diictodon		M Day 2016	Muggefontein, farm 404, Beaufort West								1
BP/1/7526	7526	ESI	Dicynodontia	Pylaecephalidae	Diictodon		M Day 2016	Muggefontein, farm 404, Beaufort West						1
BP/1/7528	7528	ESI	Dicynodontia	Pylaecephalidae	Dicynodont indet		M Day 2016	Maritzhoek, Slingersfontein 232, Beaufort West			1
BP/1/7529	7529	ESI	Dicynodontia	Pylaecephalidae	Diictodon		M Day 2016	Muggefontein, farm 404, Beaufort West				1
BP/1/7531	7531	ESI	Dicynodontia	Pylaecephalidae	Dictodon		Ken Angielczyk	Muggefontein, farm 404, Beaufort West							1
BP/1/7532	7532	ESI	Dicynodontia	Pylaecephalidae	Dicynodont indet		M Day 2016	Maritzhoek, Slingersfontein 232, Beaufort West			1
BP/1/7533	7533	ESI	Dicynodontia	Pylaecephalidae	Dicynodont indet		M Day 2016	Muggefontein, farm 404, Beaufort West								1
BP/1/7534	7534	ESI	Dicynodontia	Pylaecephalidae	Diictodon?		Ken Angielczyk	Muggefontein, farm 404, Beaufort West						1
BP/1/7535	7535	ESI	Dicynodontia	Basal Dicynodontia	Pristerodon		Ken Angielczyk	Muggefontein, farm 404, Beaufort West							1
BP/1/7536	7536	ESI	Dicynodontia	Basal Dicynodontia	Pristerodon		Ken Angielczyk	Muggefontein, farm 404, Beaufort West							1
BP/1/7537	7537	ESI	Dicynodontia	Pylaecephalidae	Diictodon		M Day 2016	Muggefontein, farm 404, Beaufort West								1
BP/1/7538	7538	ESI	Dicynodontia	Pylaecephalidae	Diictodon		M Day 2016	Muggefontein, farm 404, Beaufort West						1
BP/1/7541	7541	ESI	Dicynodontia	Pylaecephalidae	cf. Diictodon		M Day 2016	Muggefontein, farm 404, Beaufort West					1
BP/1/7542	7542	ESI	Dicynodontia	Pylaecephalidae	Dicynodont indet		M Day 2016	Muggefontein, farm 404, Beaufort West								1
BP/1/7543	7543	ESI	Dicynodontia	Pylaecephalidae	Indet.		M Day 2016	Muggefontein, farm 404, Beaufort West								1
BP/1/7544	7544	ESI	Dicynodontia	Pylaecephalidae	Indet.		M Day 2016	Muggefontein, farm 404, Beaufort West								1
BP/1/7545	7545	ESI	Dicynodontia	Pylaecephalidae	cf. Diictodon		M Day 2016	Muggefontein, farm 404, Beaufort West								1
BP/1/7546	7546	ESI	Dicynodontia	Pylaecephalidae	cf. Diictodon		M Day 2016	Muggefontein, farm 404, Beaufort West				1
BP/1/7548	7548	ESI	Dicynodontia	Pylaecephalidae	Pylaecephalid indet.		M Day 2016	Muggefontein, farm 404, Beaufort West					1
BP/1/7549	7549	ESI	Dicynodontia	Pylaecephalidae	Diictodon		M Day 2016	Muggefontein, farm 404, Beaufort West			1
BP/1/7550	7550	ESI	Dicynodontia	Pylaecephalidae	Diictodon		M Day 2016	Muggefontein, farm 404, Beaufort West								1
BP/1/7552	7552	ESI	Dicynodontia	Pylaecephalidae	Dicynodont indet		M Day 2016	Muggefontein, farm 404, Beaufort West					1
BP/1/7554	7554	ESI	Dicynodontia	Pylaecephalidae	Indet. Robertia? Brachyprosopus?		Ken Angielczyk	Maritzhoek, Slingersfontein 232, Beaufort West			1
BP/1/7560	7560	ESI	Dicynodontia	Cryptodontia	Cryptodontia indet.		Ken Angielczyk	Muggefontein, farm 404, Beaufort West								1
BP/1/7561	7561	ESI	Dicynodontia	Cryptodontia	cf. Tropidostoma		M Day 2016	Muggefontein, farm 404, Beaufort West								1
BP/1/7562	7562	ESI	Dicynodontia	Cryptodontia	Tropidostoma		B. Rubidge/ Ken Angielczyk	Muggefontein, farm 404, Beaufort West								1
BP/1/7563	7563	ESI	Dicynodontia	Cryptodontia	Tropidostoma		M Day 2016	Muggefontein, farm 404, Beaufort West								1
BP/1/7564	7564	ESI	Dicynodontia	Endothiodontidae	Endothiodon		M Day 2016	Muggefontein, farm 404, Beaufort West							1
BP/1/7565	7565	ESI	Dicynodontia	Cryptodontia	cf. Tropidostoma		Ken Angielczyk	Muggefontein, farm 404, Beaufort West								1
BP/1/7566	7566	ESI	Dicynodontia	Emydopoidea	Dicynodontoides		Ken Angielczyk	Muggefontein, farm 404, Beaufort West								1
BP/1/7567	7567	ESI	Dicynodontia	Cryptodontia	cf. Tropidostoma		M Day 2016	Muggefontein, farm 404, Beaufort West								1
BP/1/7570	7570	ESI	Dicynodontia	Endothiodontidae	Endothiodon		M Day 2016	Muggefontein, farm 404, Beaufort West						1
BP/1/7572	7572	ESI	Dicynodontia	Cryptodontia	Tropidostoma		Ken Angielczyk	Muggefontein, farm 404, Beaufort West								1
BP/1/7573	7573	ESI	Dicynodontia?	Cryptodontia	Tropidostoma?		Ken Angielczyk	Muggefontein, farm 404, Beaufort West								1
BP/1/7574	7574	ESI	Dicynodontia	Cryptodontia	?Cryptodontia indet.		Ken Angielczyk	Muggefontein, farm 404, Beaufort West								1
BP/1/7577	7577	ESI	Dicynodontia	Cryptodontia	cf. Tropidostoma (though could be Oudenodon)		B. Rubidge/ Ken Angielczyk	Muggefontein, farm 404, Beaufort West								1
BP/1/7578	7578	ESI	Dicynodontia	?	Dicynodont indet.		M Day 2016	Muggefontein, farm 404, Beaufort West								1
BP/1/7580	7580	ESI	Dicynodontia?	Endothiodontidae	Endothiodon		Ken Angielczyk	Muggefontein, farm 404, Beaufort West						1
BP/1/7581	7581	ESI	Dicynodontia	Pylaecephalidae	cf. Diictodon		Ken Angielczyk	Muggefontein, farm 404, Beaufort West					1
BP/1/7582	7582	ESI	Dicynodontia	Emydopoidea	cf. Emydops		Ken Angielczyk	Muggefontein, farm 404, Beaufort West								1
BP/1/7583A	7583A	ESI	Dicynodontia	Cryptodontia	Tropidostoma		Ken Angielczyk	Muggefontein, farm 404, Beaufort West								1
BP/1/7583B	7583B	ESI	Dicynodontia	Pylaecephalidae	Diictodon		Ken Angielczyk	Muggefontein, farm 404, Beaufort West								1
BP/1/7589	7589	ESI	Dicynodontia	?	Dicynodont indet.		M Day 2016	Muggefontein, farm 404, Beaufort West								1
BP/1/7590A	7590A	ESI	Dicynodontia	Basal Dicynodontia	cf. Brachyprosopus/Endothiodon		M Day/Ken Angielczyk	Muggefontein, farm 404, Beaufort West							1
BP/1/7591	7591	ESI	Dicynodontia	?	Dicynodont indet		Ken Angielczyk	Muggefontein, farm 404, Beaufort West								1
BP/1/7592	7592	ESI	Dicynodontia		Indet.		M Day 2016	Muggefontein, farm 404, Beaufort West				1
BP/1/7593	7593	ESI	Dicynodontia	Pylaecephalidae	Diictodon?		M Day 2016	Muggefontein, farm 404, Beaufort West					1
BP/1/7594	7594	ESI	Dicynodontia	Basal Dicynodontia	Pristerodon?		Ken Angielczyk	Muggefontein, farm 404, Beaufort West		1
BP/1/7596	7596	ESI	Dicynodontia	Pylaecephalidae	Diictodon		M Day 2016	Muggefontein, farm 404, Beaufort West					1
BP/1/7597	7597	ESI	Dicynodontia	Pylaecephalidae	Diictodon?		Ken Angielczyk	Muggefontein, farm 404, Beaufort West					1
BP/1/7598	7598	ESI	Dicynodontia	Pylaecephalidae	Diictodon		M Day 2016	Muggefontein, farm 404, Beaufort West					1
BP/1/7601	7601	ESI	Dicynodontia	Pylaecephalidae	cf. Diictodon		M Day 2016	Muggefontein, farm 404, Beaufort West					1
BP/1/7603	7603	ESI	Dicynodontia	Pylaecephalidae	Diictodon		B. Rubidge/ Ken Angielczyk	Muggefontein, farm 404, Beaufort West				1
BP/1/7604	7604	ESI	Dicynodontia	Pylaecephalidae	Diictodon		M Day 2016	Muggefontein, farm 404, Beaufort West				1
BP/1/7606	7606	ESI	Dicynodontia	Cryptodontia	Tropidostoma		Ken Angielczyk	Muggefontein, farm 404, Beaufort West								1
BP/1/7608	7608	ESI	Dicynodontia	Pylaecephalidae	Pylaecephalid indet.		M Day 2016	Muggefontein, farm 404, Beaufort West					1
BP/1/7609	7609	ESI	Dicynodontia	Basal Dicynodontia	Pristerodon		B. Rubidge/Mike Day	Muggefontein, farm 404, Beaufort West						1
BP/1/7610	7610	ESI	Dicynodontia	Pylaecephalidae	Diictodon		M Day 2016	Muggefontein, farm 404, Beaufort West								1
BP/1/7611	7611	ESI	Dicynodontia	Pylaecephalidae	Diictodon		B. Rubidge/Kenneth Angielczyk	Hendriks Kraal 298, Beaufort West					1
BP/1/7612	7612	ESI	Dicynodontia	Pylaecephalidae	Diictodon		M Day 2016	Muggefontein, farm 404, Beaufort West								1
BP/1/7613	7613	ESI	Dicynodontia	Basal Dicynodontia	Pristerodon		Ken Angielczyk	Muggefontein, farm 404, Beaufort West								1
BP/1/7614	7614	ESI	Dicynodontia	Basal Dicynodontia	Pristerodon	mackayi	Ken Angielczyk	Muggefontein, farm 404, Beaufort West						1
BP/1/7615	7615	ESI	Dicynodontia	Basal Dicynodontia	Pristerodon?		B. Rubidge	Muggefontein, farm 404, Beaufort West								1
BP/1/7618	7618	ESI	Dicynodontia	Cryptodontia	Tropidostoma		Ken Angielczyk	Muggefontein, farm 404, Beaufort West								1
BP/1/7620	7620	ESI	Dicynodontia	Basal Dicynodontia	Pristerodon		B. Rubidge/ Ken Angielczyk	Muggefontein, farm 404, Beaufort West							1
BP/1/7621	7621	ESI	Dicynodontia	Pylaecephalidae	Robertia?		Ken Angielczyk	Maritzhoek, Slingersfontein 232, Beaufort West			1
BP/1/7622	7622	ESI	Dicynodontia	Emydopoidea	Emydops		Ken Angielczyk	Muggefontein, farm 404, Beaufort West						1
BP/1/7623	7623	ESI	Dicynodontia	Basal Dicynodontia	Pristerodon		Ken Angielczyk	Muggefontein, farm 404, Beaufort West								1
BP/1/7624	7624	ESI	Dicynodontia	Cryptodontia	Tropidostoma		Ken Angielczyk	Muggefontein, farm 404, Beaufort West								1
BP/1/7625	7625	ESI	Dicynodontia	Pylaecephalidae	Diictodon		M Day 2016	Muggefontein, farm 404, Beaufort West								1
BP/1/7627	7627	ESI	Dicynodontia	Pylaecephalidae	Diictodon		M Day 2016	Muggefontein, farm 404, Beaufort West								1
BP/1/7628	7628	ESI	Dicynodontia	Pylaecephalidae	Diictodon		Ken Angielczyk	Muggefontein, farm 404, Beaufort West						1
BP/1/7630	7630	ESI	Dicynodontia	Pylaecephalidae	cf. Diictodon		M Day 2016	Muggefontein, farm 404, Beaufort West					1
BP/1/7631	7631	ESI	Dicynodontia	Basal Dicynodontia	cf. Pristerodon		M Day 2016	Maritzhoek, Slingersfontein 232, Beaufort West			1
BP/1/7632	7632	ESI	Dicynodontia	Basal Dicynodontia	Pristerodon		B. Rubidge/ Ken Angielczyk	Muggefontein, farm 404, Beaufort West							1
BP/1/7633	7633	ESI	Dicynodontia	Pylaecephalidae	Diictodon		M Day 2016	Muggefontein, farm 404, Beaufort West					1
BP/1/7636	7636	ESI	Dicynodontia	Basal Dicynodontia	cf. Pristerodon		Ken Angielczyk	Muggefontein, farm 404, Beaufort West						1
BP/1/7637	7637	ESI	Dicynodontia	Pylaecephalidae	Diictodon		M Day 2016	Muggefontein, farm 404, Beaufort West								1
BP/1/7638	7638	ESI	Dicynodontia	Basal Dicynodontia	cf. Pristerodon		M Day 2016	Muggefontein, farm 404, Beaufort West								1
BP/1/7639	7639	ESI	Dicynodontia	Pylaecephalidae	Diictodon		M Day 2016	Muggefontein, farm 404, Beaufort West								1
BP/1/7640	7640	ESI	Dicynodontia	Pylaecephalidae	Diictodon		M Day 2016	Muggefontein, farm 404, Beaufort West							1
BP/1/7641	7641	ESI	Dicynodontia	?	Dicynodont indet.		Ken Angielczyk	Muggefontein, farm 404, Beaufort West								1
BP/1/7669	7669	ESI	Dicynodontia	Pylaecephalidae	cf. Diictodon		M Day 2016	Tierhoek, Tygerhoek 468, Fraserburg					1
BP/1/7670	7670	ESI	Dicynodontia	Pylaecephalidae	Diictodon		M Day 2016	Muggefontein, farm 404, Beaufort West					1
BP/1/7672	7672	ESI	Dicynodontia	Pylaecephalidae	cf. Diictodon		M Day 2016	Tierhoek, Tygerhoek 468, Fraserburg					1
BP/1/7673	7673	ESI	Dicynodontia	Pylaecephalidae	cf. Diictodon		M Day 2016	Spinnekopkraal 466, Fraserburg							1
BP/1/7674	7674	ESI	Dicynodontia	Pylaecephalidae	Diictodon		M Day 2016	Spinnekopkraal 466, Fraserburg					1
BP/1/7677	7677	ESI	Dicynodontia	Pylaecephalidae	Diictodon		M Day 2016	Spinnekopkraal 466, Fraserburg							1
BP/1/7678	7678	ESI	Dicynodontia	Pylaecephalidae	Dicyndont indet.		M Day 2016	Spinnekopkraal 466, Fraserburg							1
BP/1/7680	7680	ESI	Dicynodontia	Pylaecephalidae	Diictodon		M Day 2016	Spinnekopkraal 466, Fraserburg							1
BP/1/7681	7681	ESI	Dicynodontia	Pylaecephalidae	Diictodon		M Day 2016	Tierhoek, Tygerhoek 468, Fraserburg				1
BP/1/7682	7682	ESI	Dicynodontia	Pylaecephalidae	cf. Diictodon		M Day 2016	Muggefontein, farm 404, Beaufort West					1
BP/1/7683	7683	ESI	Dicynodontia	Pylaecephalidae	Diictodon		M Day 2016	Spinnekopkraal 466, Fraserburg							1
BP/1/7684	7684	ESI	Dicynodontia	Pylaecephalidae	Diictodon		M Day 2016	Spinnekopkraal 466, Fraserburg							1
BP/1/7685	7685	ESI	Dicynodontia	Pylaecephalidae	Dicynodont indet.		M Day 2016	Spinnekopkraal 466, Fraserburg							1
BP/1/7694	7694	ESI	Dicynodontia	Pylaecephalidae	Diictodon		M Day 2016	Spinnekopkraal 466, Fraserburg							1
BP/1/7696	7696	ESI	Dicynodontia	Pylaecephalidae	cf. Diictodon		M Day 2016	Tierhoek, Tygerhoek 468, Fraserburg					1
BP/1/7697	7697	ESI	Dicynodontia	Pylaecephalidae	cf. Diictodon		M Day 2016	Spinnekopkraal 466, Fraserburg							1
BP/1/7699	7699	ESI	Dicynodontia	Pylaecephalidae	Pylaecephalid indet.		M Day 2016	Tierhoek, Tygerhoek 468, Fraserburg				1
BP/1/7700	7700	ESI	Dicynodontia	Pylaecephalidae	Dicynodont indet.		M Day 2016	Spinnekopkraal 466, Fraserburg							1
BP/1/7703	7703	ESI	Dicynodontia	Pylaecephalidae	Diictodon		M Day 2016	Spinnekopkraal 466, Fraserburg							1
BP/1/7704	7704	ESI	Dicynodontia	Pylaecephalidae	cf. Diictodon		M Day 2016	Spinnekopkraal 466, Fraserburg								1
BP/1/7708	7708	ESI	Dicynodontia	Pylaecephalidae	Diictodon		M Day 2016	Spinnekopkraal 466, Fraserburg							1
BP/1/7710	7710	ESI	Dicynodontia	Pylaecephalidae	Diictodon		M Day 2016	Spinnekopkraal 466, Fraserburg							1
BP/1/7711	7711	ESI	Dicynodontia	Basal Dicynodontia	Pristerodon		B.S.Rubidge	Spinnekopkraal 466, Fraserburg							1
BP/1/7712	7712	ESI	Dicynodontia	Pylaecephalidae	cf. Diictodon		M Day 2016	Spinnekopkraal 466, Fraserburg							1
BP/1/7714	7714	ESI	Dicynodontia	Pylaecephalidae	Dicynodont indet.		M Day 2016	Spinnekopkraal 466, Fraserburg							1
BP/1/7715	7715	ESI	Dicynodontia	Pylaecephalidae	Diictodon		M Day 2016	Spinnekopkraal 466, Fraserburg							1
BP/1/7716	7716	ESI	Dicynodontia	Pylaecephalidae	cf. Diictodon		M Day 2016	Tierhoek, Tygerhoek 468, Fraserburg					1
BP/1/7719	7719	ESI	Dicynodontia	Pylaecephalidae	cf. Diictodon		M Day 2016	Tierhoek, Tygerhoek 468, Fraserburg					1
BP/1/7721	7721	ESI	Dicynodontia	Pylaecephalidae	cf. Diictodon		M Day 2016	Tierhoek, Tygerhoek 468, Fraserburg				1
BP/1/7724	7724	ESI	Dicynodontia	Pylaecephalidae	Diictodon		M Day 2016	Spinnekopkraal 466, Fraserburg							1
BP/1/7725	7725	ESI	Dicynodontia	Pylaecephalidae	Dicynodont indet.		Angielczyk	Spinnekopkraal 466, Fraserburg							1
BP/1/7726	7726	ESI	Dicynodontia	Basal Dicynodontia	Pristerodon		Ken Angielczyk	Spinnekopkraal 466, Fraserburg						1
BP/1/7730	7730	ESI	Dicynodontia	Pylaecephalidae	cf. Diictodon		M Day 2016	Spinnekopkraal 466, Fraserburg					1
BP/1/7733	7733	ESI	Dicynodontia	Pylaecephalidae	Diictodon		M Day 2016	Tierhoek, Tygerhoek 468, Fraserburg					1
BP/1/7734	7734	ESI	Dicynodontia	Pylaecephalidae	Diictodon		M Day 2016	Tierhoek, Tygerhoek 468, Fraserburg					1
BP/1/7735	7735	ESI	Dicynodontia	Pylaecephalidae	Diictodon		M Day 2016	Spinnekopkraal 466, Fraserburg							1
BP/1/7736	7736	ESI	Dicynodontia	Pylaecephalidae	Dicynodont indet.		M Day 2016	Spinnekopkraal 466, Fraserburg							1
BP/1/7743	7743	ESI	Dicynodontia	Pylaecephalidae	Diictodon		B.S.Rubidge/ Ken Angielczyk	Tierhoek, Tygerhoek 468, Fraserburg					1
BP/1/7753	7753	ESI	Dicynodontia	Endothiodontidae	cf. Endothiodon		M Day 2016	Spinnekopkraal 466, Fraserburg							1
BP/1/7754	7754	ESI	Dicynodontia	Endothiodontidae	cf Endothiodon		Ken Angielczyk	Spinnekopkraal 466, Fraserburg							1
BP/1/7757	7757	ESI	Dicynodontia	Pylaecephalidae	cf. Diictodon		M Day 2016	Spinnekopkraal 466, Fraserburg							1
BP/1/7758	7758	ESI	Dicynodontia	Pylaecephalidae	Diictodon		B.S.Rubidge/Ken Angielczyk	Spinnekopkraal 466, Fraserburg							1
BP/1/7759	7759	ESI	Dicynodontia	Pylaecephalidae	Diictodon		B.S.Rubidge/Ken Angielczyk	Spinnekopkraal 466, Fraserburg							1
BP/1/7760	7760	ESI	Dicynodontia?	Basal Dicynodontia	cf. Pristerodon		Ken Angielczyk	Spinnekopkraal 466, Fraserburg							1
BP/1/7762	7762	ESI	Dicynodontia	Pylaecephalidae	cf. Diictodon		M Day 2016	Spinnekopkraal 466, Fraserburg					1
BP/1/7763	7763	ESI	Dicynodontia	Pylaecephalidae	Diictodon		B.S.Rubidge/Ken Angielczyk	Spinnekopkraal 466, Fraserburg							1
BP/1/7766	7766	ESI	Dicynodontia	Pylaecephalidae	cf. Diictodon		M Day 2016	Spinnekopkraal 466, Fraserburg							1
BP/1/7770	7770	ESI	Dicynodontia	Basal Dicynodontia	Pristerodon?		B.S.Rubidge/Ken Angielczyk	Spinnekopkraal 466, Fraserburg							1
BP/1/7772	7772	ESI	Dicynodontia	Pylaecephalidae	Diictodon		M Day 2016	Spinnekopkraal 466, Fraserburg							1
BP/1/7779	7779	ESI	Dicynodontia	Pylaecephalidae	Dicyndont indet.		M Day 2016	Tierhoek, Tygerhoek 468, Fraserburg				1
BP/1/7783	7783	ESI	Dicynodontia	Pylaecephalidae	Diictodon		M Day 2016	Tierhoek, Tygerhoek 468, Fraserburg					1
BP/1/7785	7785	ESI	Dicynodontia	Pylaecephalidae	Diictodon		B.S.Rubidge/Ken Angielczyk	Tierhoek, Tygerhoek 468, Fraserburg				1
BP/1/7793	7793	ESI	Dicynodontia	Pylaecephalidae	Diictodon		M Day 2016	Spinnekopkraal 466, Fraserburg							1
BP/1/7803	7803	ESI	Dicynodontia	Pylaecephalidae	Brachyprosopus or juvenile Endothiodon		Ken Angielczyk	Spinnekopkraal 466, Fraserburg							1
BP/1/7804	7804	ESI	Dicynodontia	Basal Dicynodontia	Pristerodon		Ken Angielczyk	Spinnekopkraal 466, Fraserburg							1
BP/1/7807	7807	ESI	Dicynodontia	Cryptodontia	Tropidostoma?		Ken Angielczyk	Grootfontein 392, Fraserburg								1
BP/1/7816	7816	ESI	Dicynodontia	Pylaecephalidae	Robertia?		Ken Angielczyk	Brakleegte 297/Wolwehoek, Hendriks Kraal 298, Beaufort West		1
C53	53	CGS	Dicynodontia	Pylaecephalidae	Diictodon	feliceps	Frobisch and Kammerer pers. comm. 2015	Tierhoek, Tygerhoek 468, Fraserburg				1
C55	55	CGS	Dicynodontia	?	Unidentified		Frobisch and Kammerer pers. comm. 2015	Tierhoek, Tygerhoek 468, Fraserburg				1
C56	56	CGS	Dicynodontia	Pylaecephalidae	Diictodon	feliceps	Frobisch and Kammerer pers. comm. 2015	Tierhoek, Tygerhoek 468, Fraserburg				1
C57	57	CGS	Dicynodontia	Pylaecephalidae	Diictodon	feliceps	Frobisch and Kammerer pers. comm. 2015	Tierhoek, Tygerhoek 468, Fraserburg				1
C58	58	CGS	Dicynodontia	Pylaecephalidae	Diictodon	feliceps	Frobisch and Kammerer pers. comm. 2015	Tierhoek, Tygerhoek 468, Fraserburg				1
C62	62	CGS	Dicynodontia	Pylaecephalidae	Diictodon	feliceps	Frobisch and Kammerer pers. comm. 2015	Tierhoek, Tygerhoek 468, Fraserburg				1
CBT103		CGS	Dicynodontia	?	Unidentifiable		Frobish sheet 2015	Portugals River 218, Sutherland		1
CBT104		CGS	Dicynodontia	Basal Dicynodontia	Pristerodon	sp.	Frobish sheet 2015	Portugals River 218, Sutherland		1
cdb21		CGS	Dicynodontia	?	Unidentifiable		Frobish sheet 2015	Boshof 346, Fraserburg				1
cdb4		CGS	Dicynodontia	?	Unidentifiable		Frobish sheet 2015	Droogvoetsfontein 356, Fraserburg				1
cdb42		CGS	Dicynodontia	?	Unidentifiable		Frobish sheet 2015	Kalkfontein 332, Fraserburg				1
cdb5		CGS	Dicynodontia	Basal Dicynodontia	Pristerodon	mackayi	Frobish sheet 2015	Droog Voets Fontein 350, Fraserburg					1
cdb56		CGS	Dicynodontia	Pylaecephalidae	Diictodon		Frobish sheet 2015	Grootwamakersvlei 304, Fraserburg		0.333333
F139		CGS	Dicynodontia	Basal Dicynodontia	Pristerodon	mackayi	Frobish sheet 2015	Alfresco, Gannakraal 422, Fraseburg				1
F155		CGS	Dicynodontia	Pylaecephalidae	Diictodon		Frobish sheet 2015	Puntkraal, Uitvlugt 90, Sutherland				1
F27	27	CGS	Dicynodontia	Emydopoidea	Dicynodontoides	recurvidens	Frobisch and Kammerer pers. comm. 2015	Bank Gaten 250, Beaufort West			1
GM65		CGS	Dicynodontia	Basal Dicynodontia	Pristerodon	mackayi	Frobish sheet 2015	Bord Vol Water 313, Fraserburg		0.5	0.5
GM69		CGS	Dicynodontia	Pylaecephalidae	Eosimops	newtoni	Frobisch sheet 2015	Bord Vol Water 313, Fraserburg		0.5	0.5
RD100		CGS	Dicynodontia	Pylaecephalidae	Diictodon		Frobish sheet 2015	Platfontein 28, Beaufort West							1
RD101		CGS	Dicynodontia	Pylaecephalidae	Diictodon		Frobish sheet 2015	Platfontein 28, Beaufort West							1
RD102		CGS	Dicynodontia	Pylaecephalidae	Diictodon		Frobish sheet 2015	Platfontein 28, Beaufort West							1
RD103		CGS	Dicynodontia	Pylaecephalidae	Diictodon		Frobish sheet 2015	Platfontein 28, Beaufort West							1
RD104		CGS	Dicynodontia	Pylaecephalidae	Diictodon		Frobish sheet 2015	Platfontein 28, Beaufort West							1
RD105		CGS	Dicynodontia	Pylaecephalidae	Diictodon		Frobish sheet 2015	Platfontein 28, Beaufort West							1
RD106		CGS	Dicynodontia	?	Unidentifiable		Frobish sheet 2015	Platfontein 28, Beaufort West							1
RD107		CGS	Dicynodontia	Pylaecephalidae	Diictodon		Frobish sheet 2015	Platfontein 28, Beaufort West							1
RD108		CGS	Dicynodontia	Pylaecephalidae	Diictodon		Frobish sheet 2015	Platfontein 28, Beaufort West							1
RD109		CGS	Dicynodontia	Pylaecephalidae	Diictodon		Frobish sheet 2015	Platfontein 28, Beaufort West							1
RD112		CGS	Dicynodontia	?	Unidentifiable		Frobish sheet 2015	Platfontein 28, Beaufort West							1
RD113		CGS	Dicynodontia	Pylaecephalidae	Diictodon		Frobish sheet 2015	Platfontein 28, Beaufort West							1
RD114		CGS	Dicynodontia	Pylaecephalidae	Diictodon		Frobish sheet 2015	Platfontein 28, Beaufort West							1
rd117		CGS	Dicynodontia	Pylaecephalidae	Diictodon		Frobish sheet 2015	Kalkfontein 335, Fraserburg						0.5	0.5
rd118		CGS	Dicynodontia	?	Unidentifiable		Frobish sheet 2015	Kalkfontein 335, Fraserburg						0.5	0.5
rd119		CGS	Dicynodontia	?	Unidentifiable		Frobish sheet 2015	Kalkfontein 335, Fraserburg						0.5	0.5
rd121		CGS	Dicynodontia	?	Unidentifiable		Frobish sheet 2015	Kalkfontein 335, Fraserburg						0.5	0.5
rd122		CGS	Dicynodontia	?	Unidentifiable		Frobish sheet 2015	Kalkfontein 335, Fraserburg						0.5	0.5
rd18		CGS	Dicynodontia	Pylaecephalidae	Diictodon		Frobish sheet 2015	Platfontein 28, Beaufort West							1
rd19		CGS	Dicynodontia	Pylaecephalidae	Diictodon		Frobish sheet 2015	Platfontein 28, Beaufort West							1
rd20		CGS	Dicynodontia	Pylaecephalidae	Diictodon		Frobish sheet 2015	Platfontein 28, Beaufort West							1
rd22		CGS	Dicynodontia	Pylaecephalidae	Diictodon		Frobish sheet 2015	Platfontein 28, Beaufort West							1
rd23		CGS	Dicynodontia	Pylaecephalidae	Diictodon		Frobish sheet 2015	Platfontein 28, Beaufort West							1
rd24		CGS	Dicynodontia	Pylaecephalidae	Diictodon		Frobish sheet 2015	Platfontein 28, Beaufort West							1
rd25		CGS	Dicynodontia	Pylaecephalidae	Diictodon		Frobish sheet 2015	Platfontein 28, Beaufort West							1
rd26		CGS	Dicynodontia	Pylaecephalidae	Diictodon		Frobish sheet 2015	Platfontein 28, Beaufort West							1
rd27		CGS	Dicynodontia	Pylaecephalidae	Diictodon		Frobish sheet 2015	Platfontein 28, Beaufort West							1
rd28		CGS	Dicynodontia	Pylaecephalidae	Diictodon		Frobish sheet 2015	Platfontein 28, Beaufort West							1
rd29		CGS	Dicynodontia	Pylaecephalidae	Diictodon		Frobish sheet 2015	Platfontein 28, Beaufort West							1
rd31		CGS	Dicynodontia	Pylaecephalidae	Diictodon		Frobish sheet 2015	Platfontein 28, Beaufort West							1
rd32		CGS	Dicynodontia	Basal Dicynodontia	Pristerodon	mackayi	Frobisch and Kammerer pers. comm. 2015	Platfontein 28, Beaufort West								1
rd33		CGS	Dicynodontia	Pylaecephalidae	Diictodon	feliceps	Frobisch and Kammerer pers. comm. 2015	Platfontein 28, Beaufort West								1
rd34		CGS	Dicynodontia	Basal Dicynodontia	Pristerodon	mackayi	Frobish sheet 2015	Platfontein 28, Beaufort West							0.5	0.5
RD36		CGS	Dicynodontia	Basal Dicynodontia	Pristerodon	mackayi	Frobisch and Kammerer pers. comm. 2015	Platfontein 28, Beaufort West								1
RD99		CGS	Dicynodontia	Basal Dicynodontia	Pristerodon	mackayi	Frobisch and Kammerer pers. comm. 2015	Platfontein 28, Beaufort West							1
RS300a	300a	CGS	Dicynodontia	Endothiodontidae	Endothiodon	bathystoma	CFK 31-08-2015	Brandywynsgat 214, Beaufort West							1
RS354	354	CGS	Dicynodontia	Basal Dicynodontia	Pristerodon		Frobisch sheet 2015	Grootfontein 180, Beaufort West						0.5	0.5
RS364	364	CGS	Dicynodontia	?	Unidentified		Frobisch sheet 2015							1
RS366	366	CGS	Dicynodontia	Emydopoidea	Cistecephalus		Frobisch sheet 2015	Grootfontein, Beaufort West district. This farm mostly exposes upper Abrahamskraal Formation and Poortjie Member, with the Hoedemaker on the Nuweveld escarpment at its northeast border. The coordinates for this specimen place it in the lower-mid Poortjie. As this specimen was identified by Frobisch and Kammerer and it is highly unlikely tht Cistecephalus occurs this low, it must be wrongly number…						1
RS367	367	CGS	Dicynodontia	Pylaecephalidae	Diictodon		Frobisch sheet 2015	Grootfontein 180, Beaufort West						1
RS407		CGS	Dicynodontia	?	Unidentifiable		Frobish sheet 2015	Vinkekuil 144, Sutherland			1
RS416		CGS	Dicynodontia	Basal Dicynodontia	Pristerodon		Frobisch sheet 2015	Kliplaatsfontein (Hartebees Vlei's Berg) 210, Beaufort West				0.5	0.5
RS417		CGS	Dicynodontia	Basal Dicynodontia	Pristerodon		Frobisch sheet 2015	Kliplaatsfontein (Hartebees Vlei's Berg) 210, Beaufort West				0.5	0.5
RS419		CGS	Dicynodontia	Pylaecephalidae	Diictodon		Frobisch sheet 2015	Klipplaats Fontein (Hartebeesvlei's Berg) 210, Beaufort West				1
RS423		CGS	Dicynodontia	Basal Dicynodontia	Pristerodon		Frobisch sheet 2015	Kliplaatsfontein (Hartebees Vlei's Berg) 210, Beaufort West				1
RS45	45	CGS	Dicynodontia	?	Unknown		Day - Pristerognathus or Pristerodon on databases but not seen							1
SAM-PK-000640	640	SAM	Dicynodontia	Emydopoidea	Emydops		Frobisch sheet 2015	Goeiemoed 90, Prince Albert		0.111111	0.111111
SAM-PK-000695		SAM	Dicynodontia	Pylaecephalidae	Diictodon		Frobisch sheet 2015	Lombardskraal 330, Beaufort West		0.2	0.2	0.2	0.2	0.2
SAM-PK-000708		SAM	Dicynodontia	Emydopoidea	Emydops		Angielczyk et al 2005	Lombardskraal 330, Beaufort West		0.2	0.2	0.2	0.2	0.2
SAM-PK-000774		SAM	Dicynodontia	Emydopoidea	Emydops	arctatus	Frobisch and Kammerer pers. comm. 2015	Goeiemoed 90, Prince Albert		0.111111	0.111111
SAM-PK-000775		SAM	Dicynodontia	Emydopoidea	Emydops		Frobisch sheet 2015	Lombardskraal 330, Beaufort West		0.2	0.2	0.2	0.2	0.2
SAM-PK-001337		SAM	Dicynodontia	Pylaecephalidae	Robertia?		M Day	Seekoegat, Zeekoegat 22, Prince Albert		0.0769231	0.0769231	0.0769231
SAM-PK-003031		SAM	Dicynodontia	Basal Dicynodontia	Pristerodon?		MD 2015							0.25	0.25
SAM-PK-003032		SAM	Dicynodontia	Basal Dicynodontia	Pristerodon?		MD 2015							0.25	0.25
SAM-PK-003033		SAM	Dicynodontia	Basal Dicynodontia	Pristerodon?		MD 2015							0.25	0.25
SAM-PK-003036		SAM	Dicynodontia	Basal Dicynodontia	Pristerodon?		MD 2015							0.25	0.25
SAM-PK-003401		SAM	Dicynodontia	Basal Dicynodontia	Pristerodon?		MD 2015							0.25	0.25
SAM-PK-003402		SAM	Dicynodontia	Basal Dicynodontia	Pristerodon		MD 2015	Beaufort West (commonage), Beaufort West		0.166667	0.166667	0.166667	0.166667	0.166667	0.166667
SAM-PK-003403		SAM	Dicynodontia	Basal Dicynodontia	Pristerodon		MD 2015	Beaufort West (commonage), Beaufort West		0.166667	0.166667	0.166667	0.166667	0.166667	0.166667
SAM-PK-003404		SAM	Dicynodontia	Basal Dicynodontia	Unidentified		MD 2015							0.25	0.25
SAM-PK-003405		SAM	Dicynodontia	Basal Dicynodontia	Pristerodon		MD 2015	Beaufort West (commonage), Beaufort West		0.166667	0.166667	0.166667	0.166667	0.166667	0.166667
SAM-PK-003406		SAM	Dicynodontia	Basal Dicynodontia	Pristerodon?		MD 2015	Beaufort West (commonage), Beaufort West		0.166667	0.166667	0.166667	0.166667	0.166667	0.166667
SAM-PK-003409		SAM	Dicynodontia	Basal Dicynodontia	Pristerodon		MD 2015	Beaufort West (commonage), Beaufort West		0.166667	0.166667	0.166667	0.166667	0.166667	0.166667
SAM-PK-011690		SAM	Dicynodontia	Pylaecephalidae	Robertia	broomiana	Frobisch sheet 2015	Goeiemoed 90, Prince Albert		0.111111	0.111111
SAM-PK-011800		SAM	Dicynodontia	Pylaecephalidae	Diictodon		Day	Dubbelsfontein, Kaffirs Kraal 380, Beaufort West		0.1	0.1	0.1	0.1
SAM-PK-011806		SAM	Dicynodontia	Pylaecephalidae	Diictodon		Day	Dubbelsfontein, Kaffirs Kraal 380, Beaufort West		0.1	0.1	0.1	0.1
SAM-PK-011808		SAM	Dicynodontia	Pylaecephalidae	Diictodon		Day	Dubbelsfontein, Kaffirs Kraal 380, Beaufort West		0.1	0.1	0.1	0.1
SAM-PK-011814		SAM	Dicynodontia	Pylaecephalidae	Diictodon		Day	Dubbelsfontein, Kaffirs Kraal 380, Beaufort West		0.1	0.1	0.1	0.1
SAM-PK-011815		SAM	Dicynodontia	Pylaecephalidae	Diictodon		Day	Dubbelsfontein, Kaffirs Kraal 380, Beaufort West		0.1	0.1	0.1	0.1
SAM-PK-011820		SAM	Dicynodontia	Pylaecephalidae	Diictodon		Day	Dubbelsfontein, Kaffirs Kraal 380, Beaufort West		0.1	0.1	0.1	0.1
SAM-PK-011885		SAM	Dicynodontia	Pylaecephalidae	Diictodon?		M Day 2015	Mechaus Request 242, Beaufort West		0.25	0.25	0.25
SAM-PK-012258		SAM	Dicynodontia	Pylaecephalidae	Diictodon		Frobish sheet 2015	Beukesplaas, Gannakraal 422, Fraserburg			0.5	0.5
SAM-PK-012259		SAM	Dicynodontia	Basal Dicynodontia	Brachyprosopus	broomi	Angielczyk et al 2015	Beukesplaas, Gannakraal 422, Fraserburg			0.5	0.5
SAM-PK-3354	3354	SAM	Dicynodontia	?	Unidentifiable		Day	Abrahamskraal, Prince Albert		0.125
SAM-PK-K06515		SAM	Dicynodontia	Emydopoidea	Emydops		Angielczyk	Putfontein 320, Beaufort West				0.333333	0.333333	0.333333
SAM-PK-K06522		SAM	Dicynodontia	Emydopoidea	Emydops		Angielczyk	Putfontein 320, Beaufort West				0.333333	0.333333	0.333333
SAM-PK-K06686		SAM	Dicynodontia	Basal Dicynodontia	Pristerodon		MD 2015	Hoedemaker 239, Beaufort West				0.142857	0.142857	0.142857	0.142857	0.142857
SAM-PK-K06818		SAM	Dicynodontia	Pylaecephalidae	Diictodon		Frobisch sheet 2015	Matjes Kloof 235, Beaufort West				0.166667	0.166667	0.166667	0.166667	0.166667
SAM-PK-K07603	K07603	SAM	Dicynodontia	Pylaecephalidae	Diictodon		Frobisch sheet 2015	Leeurivier, Rietfontein 306, Beaufort West		0.333333
SAM-PK-K07617	K07617	SAM	Dicynodontia	?	Unidentifiable		Frobisch sheet 2015	Bloukrans 31, Prince Albert		0.142857	0.142857	0.142857
SAM-PK-K07619	K07619	SAM	Dicynodontia	?	Unidentifiable		Frobisch sheet 2015	Bloukrans 31, Prince Albert		0.142857	0.142857	0.142857
SAM-PK-K07626	K07626	SAM	Dicynodontia	?	Unidentifiable		Frobisch sheet 2015	Bloukrans 31, Prince Albert		0.142857	0.142857	0.142857
SAM-PK-K07633	K07633	SAM	Dicynodontia	?	Unidentifiable		Frobisch sheet 2015	Bloukrans 31, Prince Albert		0.142857	0.142857	0.142857
SAM-PK-K07641		SAM	Dicynodontia	Emydopoidea	Dicynodontoides		Angielczyk et al 2009	La-de-da 178, Beaufort West							1
SAM-PK-K07643		SAM	Dicynodontia	Pylaecephalidae	Diictodon		Frobisch sheet 2015	La-de-da 178, Beaufort West		0.166667	0.166667	0.166667	0.166667	0.166667	0.166667
SAM-PK-K07652		SAM	Dicynodontia	Pylaecephalidae	Diictodon?		Day				0.166667	0.166667	0.166667	0.166667	0.166667	0.166667
SAM-PK-K07914	K07914	SAM	Dicynodontia	Basal Dicynodontia	Eodicynodon		CFK 31-08-2015	Kweekkraal 92, Prince Albert		0.02	0.02	0.02
SAM-PK-K09997		SAM	Dicynodontia	Basal Dicynodontia	Pristerodon		Frobisch sheet 2015	La-de-da 178, Beaufort West				1
SAM-PK-K10105		SAM	Dicynodontia	Pylaecephalidae	Eosimops?		?	Putfontein 320, Beaufort West				1
SAM-PK-K10108		SAM	Dicynodontia	Pylaecephalidae	Diictodon		CFK 31-08-2015	Farm 185, Beaufort West							1
SAM-PK-K7607	K7607	SAM	Dicynodontia	Basal Dicynodontia	Brachyprosopus	broomi	Angielczyk et al 2015	Leeurivier, Rietfontein 306, Beaufort West		0.333333
SAM-PK-K7632	K7632	SAM	Dicynodontia	?	Unidentifiable		Day			0.0555556	0.0555556	0.0555556
T34	34	CGS	Dicynodontia	Basal Dicynodontia	Pristerodon		Frobisch sheet 2015	Rietfontein 122, Beaufort West							1
TM 1549		TM	Dicynodontia	?	Unidentifiable		Frobisch sheet 2015	Abrahamskraal 29, Prince Albert		0.125
TM 361		TM	Dicynodontia	Pylaecephalidae	Diictodon		Frobisch sheet 2015	Abrahamskraal 29, Prince Albert		0.125
From Day et al (2018) for lower Hoedemaker extra																866
										Total dicynodonts
										27.4672	21.3065	48.6577	86.3504	56.9095	95.1429	937.976
Collection number	Number	Collection	Higher Taxon	Family or Clade	Genus	Species	Source of ID	Locality		Upper Moordenaars	Lower Karelskraal	Upper Karelskraal	Lower Poortjie	Middle Poortjie	Upper Poortjie	Lower Hoedemaker
BP/1/2234	2234	ESI	Dicynodontia	Pylaecephalidae	Robertia	broomiana	Kammerer ESI catalogue	Kleinwaterval, Spreeuw Fontein 26, Prince Albert		0.0833333	0.0833333
BP/1/2235	2235	ESI	Dicynodontia	Pylaecephalidae	Robertia	broomiana	Kammerer ESI catalogue	Kleinwaterval, Spreeuw Fontein 26, Prince Albert		0.0833333	0.0833333
BP/1/286	286	ESI	Dicynodontia	Pylaecephalidae	Robertia	broomiana	Frobisch sheet 2015	Antjiesfontein, Leeukraal 24, Prince Albert		0.125	0.125
BP/1/289	289	ESI	Dicynodontia	Pylaecephalidae	Robertia	broomiana	Frobisch sheet 2015	Antjiesfontein, Leeukraal 24, Prince Albert		0.125	0.125
BP/1/292	292	ESI	Dicynodontia	Pylaecephalidae	Robertia	broomiana	Frobisch sheet 2015	Antjiesfontein, Leeukraal 24, Prince Albert		0.125	0.125
BP/1/6967	6967	ESI	Dicynodontia	Pylaecephalidae	Robertia?		Rubidge ESI catalogue	Bloukrans 31, Prince Albert		1
BP/1/6989	6989	ESI	Dicynodontia	Pylaecephalidae	Eosimops	newtoni	Angielczyk ESI catalogue	Baviaans Drift 36, Sutherland		0.333333
BP/1/7050	7050	ESI	Dicynodontia	Pylaecephalidae	Robertia	broomiana	J Frobisch	Jakkalsfontein, Ratelfontein 74, Prince Albert		0.142857
BP/1/7096	7096	ESI	Dicynodontia	Pylaecephalidae	Prosictodon		Angielczyk ESI catalogue	Celeryfontein, Sellery Fontein 426, Fraserburg				1
BP/1/7103	7103	ESI	Dicynodontia	Pylaecephalidae	Robertia or Eosimops		Angielczyk ESI catalogue	Goeiemoed 90, Prince Albert		0.125	0.125
BP/1/7163	7163	ESI	Dicynodontia	Pylaecephalidae	Robertia	broomiana	CFK 31-08-2015	Farm just outside Sutherland (probably Klipkraal 82), Sutherland		0.5
BP/1/7164	7164	ESI	Dicynodontia	Pylaecephalidae	Eosimops	newtoni	CFK 31-08-2015	Farm just outside Sutherland (probably Klipkraal 82), Sutherland		0.5
BP/1/7188	7188	ESI	Dicynodontia	Pylaecephalidae	Robertia	broomiana	Angielczyk ESI catalogue	Palmietfontein 42, Sutherland		0.333333	0.333333	0.333333
BP/1/7190	7190	ESI	Dicynodontia	Pylaecephalidae	Prosictodon		Angielczyk ESI catalogue	Goeiemoed 90, Prince Albert		0.125	0.125
BP/1/7202	7202	ESI	Dicynodontia	Pylaecephalidae	Robertia or Eosimops		K Angielczyk	Goeiemoed 90, Prince Albert		0.125	0.125
BP/1/7207	7207	ESI	Dicynodontia	Pylaecephalidae	Robertia	broomiana	Angielczyk ESI catalogue	Goeiemoed 90, Prince Albert		0.125	0.125
BP/1/7230	7230	ESI	Dicynodontia	Basal Dicynodontia	Eosimops	newtoni	Ken Angielczyk	Prinshof, Bastards Berg 35, Sutherland				1
BP/1/7621	7621	ESI	Dicynodontia	Pylaecephalidae	Robertia?		Ken Angielczyk	Maritzhoek, Slingersfontein 232, Beaufort West			1
BP/1/7816	7816	ESI	Dicynodontia	Pylaecephalidae	Robertia?		Ken Angielczyk	Brakleegte 297/Wolwehoek, Hendriks Kraal 298, Beaufort West		1
GM69		CGS	Dicynodontia	Pylaecephalidae	Eosimops	newtoni	Frobisch sheet 2015	Bord Vol Water 313, Fraserburg		0.5	0.5
SAM-PK-001337		SAM	Dicynodontia	Pylaecephalidae	Robertia?		M Day	Seekoegat, Zeekoegat 22, Prince Albert		0.0769231	0.0769231	0.0769231
SAM-PK-011690		SAM	Dicynodontia	Pylaecephalidae	Robertia	broomiana	Frobisch sheet 2015	Goeiemoed 90, Prince Albert		0.111111	0.111111
SAM-PK-012259		SAM	Dicynodontia	Basal Dicynodontia	Brachyprosopus	broomi	Angielczyk et al 2015	Beukesplaas, Gannakraal 422, Fraserburg			0.5	0.5
SAM-PK-K10105		SAM	Dicynodontia	Pylaecephalidae	Eosimops?		?	Putfontein 320, Beaufort West				1
SAM-PK-K7607	K7607	SAM	Dicynodontia	Basal Dicynodontia	Brachyprosopus	broomi	Angielczyk et al 2015	Leeurivier, Rietfontein 306, Beaufort West		0.333333
										Of which guadalupian dicynodonts
										5.87256	3.56303	3.91026	0	0	0	0
Collection number	Number	Collection	Higher Taxon	Family or Clade	Genus	Species	Source of ID	Locality		Upper Moordenaars	Lower Karelskraal	Upper Karelskraal	Lower Poortjie	Middle Poortjie	Upper Poortjie	Lower Hoedemaker
15/1/A6 - Uncatalogued specimen		ESI	Dicynodontia	Endothiodontidae	Endothiodon		M Day	Spinnekopkraal 466, Fraserburg							1
AM 3744	3744	AM	Dicynodontia	Cryptodontia	Tropidostoma		CFK 31-08-2015	Hottentots River 296, Beaufort West								1
BP/1/7250	7250	ESI	Dicynodontia	Endothiodontidae	Endothiodon		M Day 2016	Brakleegte 297/Wolwehoek, Hendriks Kraal 298, Beaufort West							1
BP/1/7251	7251	ESI	Dicynodontia		Dicynodontia cf. Endothiodon		M Day 2016	Brakleegte 297/Wolwehoek, Hendriks Kraal 298, Beaufort West						1
BP/1/7253	7253	ESI	Dicynodontia	Endothiodontidae	Endothiodon?		M Day 2016	Weltevrede Wes 172, Beaufort West						1
BP/1/7254	7254	ESI	Dicynodontia	Endothiodontidae	Endothiodon		M Day 2016	Brakleegte 297/Wolwehoek, Hendriks Kraal 298, Beaufort West						1
BP/1/7264	7264	ESI	Dicynodontia		Dicynodont indet.; medium size		M Day 2016	Brakleegte 297/Wolwehoek, Hendriks Kraal 298, Beaufort West						1
BP/1/7267	7267	ESI	Dicynodontia	Endothiodontidae	Endothiodon		M Day 2016	Losberg1, Blaauwkrans 216, Beaufort West						1
BP/1/7279	7279	ESI	Dicynodontia	Endothiodontidae	Endothiodon		M Day 2016	Weltevrede Wes 172, Beaufort West						1
BP/1/7283	7283	ESI	Dicynodontia	Endothiodontidae	Endothiodon?		M Day 2016	Weltevrede Wes 172, Beaufort West						1
BP/1/7349	7349	ESI	Dicynodontia	Endothiodontidae	Endothiodon		M Day 2016	Weltevrede Wes 172, Beaufort West						1
BP/1/7350	7350	ESI	Dicynodontia	Endothiodontidae	Endothiodon		M Day 2016	Weltevrede Wes 172, Beaufort West						1
BP/1/7356	7356	ESI	Dicynodontia	Endothiodontidae	Endothiodon		M Day 2016	Losberg1, Blaauwkrans 216, Beaufort West							1
BP/1/7376	7376	ESI	Dicynodontia	Endothiodontidae	Endothiodon?		M Day 2016	Puntkraal, Uitvlug 90, Sutherland						1
BP/1/7379	7379	ESI	Dicynodontia	Endothiodontidae	Endothiodon		M Day 2016	Puntkraal, Uitvlug 90, Sutherland						1
BP/1/7560	7560	ESI	Dicynodontia	Cryptodontia	Cryptodontia indet.		Ken Angielczyk	Muggefontein, farm 404, Beaufort West								1
BP/1/7561	7561	ESI	Dicynodontia	Cryptodontia	cf. Tropidostoma		M Day 2016	Muggefontein, farm 404, Beaufort West								1
BP/1/7562	7562	ESI	Dicynodontia	Cryptodontia	Tropidostoma		B. Rubidge/ Ken Angielczyk	Muggefontein, farm 404, Beaufort West								1
BP/1/7563	7563	ESI	Dicynodontia	Cryptodontia	Tropidostoma		M Day 2016	Muggefontein, farm 404, Beaufort West								1
BP/1/7564	7564	ESI	Dicynodontia	Endothiodontidae	Endothiodon		M Day 2016	Muggefontein, farm 404, Beaufort West							1
BP/1/7565	7565	ESI	Dicynodontia	Cryptodontia	cf. Tropidostoma		Ken Angielczyk	Muggefontein, farm 404, Beaufort West								1
BP/1/7566	7566	ESI	Dicynodontia	Emydopoidea	Dicynodontoides		Ken Angielczyk	Muggefontein, farm 404, Beaufort West								1
BP/1/7567	7567	ESI	Dicynodontia	Cryptodontia	cf. Tropidostoma		M Day 2016	Muggefontein, farm 404, Beaufort West								1
BP/1/7570	7570	ESI	Dicynodontia	Endothiodontidae	Endothiodon		M Day 2016	Muggefontein, farm 404, Beaufort West						1
BP/1/7572	7572	ESI	Dicynodontia	Cryptodontia	Tropidostoma		Ken Angielczyk	Muggefontein, farm 404, Beaufort West								1
BP/1/7573	7573	ESI	Dicynodontia?	Cryptodontia	Tropidostoma?		Ken Angielczyk	Muggefontein, farm 404, Beaufort West								1
BP/1/7577	7577	ESI	Dicynodontia	Cryptodontia	cf. Tropidostoma (though could be Oudenodon)		B. Rubidge/ Ken Angielczyk	Muggefontein, farm 404, Beaufort West								1
BP/1/7580	7580	ESI	Dicynodontia?	Endothiodontidae	Endothiodon		Ken Angielczyk	Muggefontein, farm 404, Beaufort West						1
BP/1/7583A	7583A	ESI	Dicynodontia	Cryptodontia	Tropidostoma		Ken Angielczyk	Muggefontein, farm 404, Beaufort West								1
BP/1/7606	7606	ESI	Dicynodontia	Cryptodontia	Tropidostoma		Ken Angielczyk	Muggefontein, farm 404, Beaufort West								1
BP/1/7618	7618	ESI	Dicynodontia	Cryptodontia	Tropidostoma		Ken Angielczyk	Muggefontein, farm 404, Beaufort West								1
BP/1/7624	7624	ESI	Dicynodontia	Cryptodontia	Tropidostoma		Ken Angielczyk	Muggefontein, farm 404, Beaufort West								1
BP/1/7753	7753	ESI	Dicynodontia	Endothiodontidae	cf. Endothiodon		M Day 2016	Spinnekopkraal 466, Fraserburg							1
BP/1/7754	7754	ESI	Dicynodontia	Endothiodontidae	cf Endothiodon		Ken Angielczyk	Spinnekopkraal 466, Fraserburg							1
BP/1/7807	7807	ESI	Dicynodontia	Cryptodontia	Tropidostoma?		Ken Angielczyk	Grootfontein 392, Fraserburg								1
RS300a	300a	CGS	Dicynodontia	Endothiodontidae	Endothiodon	bathystoma	CFK 31-08-2015	Brandywynsgat 214, Beaufort West							1
SAM-PK-K07641		SAM	Dicynodontia	Emydopoidea	Dicynodontoides		Angielczyk et al 2009	La-de-da 178, Beaufort West							1
																94
										Of which Lopingian dicynodonts
										0	0	0	0	13	8	110
Collection number	Number	Collection	Higher Taxon	Family or Clade	Genus	Species	Source of ID	Locality		Upper Moordenaars	Lower Karelskraal	Upper Karelskraal	Lower Poortjie	Middle Poortjie	Upper Poortjie	Lower Hoedemaker
SAM-PK-K08305	8305	SAM	Basal Synapsida	Varanopidae	Heleosaurus		Botha-Brink and Modesto, 2007	Beukesplaas, Gannakraal 422, Fraserburg			0.5	0.5
SAM-PK-K10407	10407	SAM	Basal Synapsida	Varanopidae	Varanopidae indet.		Modesto et al, 2011	La-de-da 178, Beaufort West			1
TM 1483	1483	TM	Basal Synapsida	Varanopidae	Heleosaurus (Elliotsmithia)		CFK 31-08-2015	Abrahamskraal 29, Prince Albert		0.125
TM 4024		TM	Basal Synapsida	?	Pelycosaur indet.		Reisz and Dilkes, 1992	Abrahamskraal 29, Prince Albert		0.125
										Total varanopids
										0.25	1.5	0.5	0	0	0	0
Collection number	Number	Collection	Higher Taxon	Family or Clade	Genus	Species	Source of ID	Locality		Upper Moordenaars	Lower Karelskraal	Upper Karelskraal	Lower Poortjie	Middle Poortjie	Upper Poortjie	Lower Hoedemaker
AM 2821	2821	AM	Dicynodontia	Pylaecephalidae	Diictodon		Frobisch sheet 2015	Rietfontein 12, Prince Albert		0.0909091	0.0909091	0.0909091	0.0909091
B16	16	CGS	Dicynodontia	Pylaecephalidae	Diictodon		Frobisch sheet 2015	Drie Bosch Kuil 142, Beaufort West				0.5	0.5
BP/1/273	273	ESI	Dicynodontia	Pylaecephalidae	Diictodon		Frobisch sheet 2015	Antjiesfontein, Leeukraal 24, Prince Albert		0.125	0.125
BP/1/274	274	ESI	Dicynodontia	Pylaecephalidae	Diictodon		Frobisch sheet 2015	Antjiesfontein, Leeukraal 24, Prince Albert		0.125	0.125
BP/1/277	277	ESI	Dicynodontia	Pylaecephalidae	Diictodon		Frobisch sheet 2015	Antjiesfontein, Leeukraal 24, Prince Albert		0.125	0.125
BP/1/279	279	ESI	Dicynodontia	Pylaecephalidae	Diictodon		Frobisch sheet 2015	Antjiesfontein, Leeukraal 24, Prince Albert		0.125	0.125
BP/1/280	280	ESI	Dicynodontia	Pylaecephalidae	Diictodon		Frobisch sheet 2015	Antjiesfontein, Leeukraal 24, Prince Albert		0.125	0.125
BP/1/282	282	ESI	Dicynodontia	Pylaecephalidae	Diictodon		Frobisch sheet 2015	Antjiesfontein, Leeukraal 24, Prince Albert		0.125	0.125
BP/1/283	283	ESI	Dicynodontia	Pylaecephalidae	Diictodon		Frobisch sheet 2015	Antjiesfontein, Leeukraal 24, Prince Albert		0.125	0.125
BP/1/285	285	ESI	Dicynodontia	Pylaecephalidae	Diictodon		Frobisch sheet 2015	Antjiesfontein, Leeukraal 24, Prince Albert		0.125	0.125
BP/1/287	287	ESI	Dicynodontia	Pylaecephalidae	Diictodon		Kammerer	Antjiesfontein, Leeukraal 24, Prince Albert		0.125	0.125
BP/1/288	288	ESI	Dicynodontia	Pylaecephalidae	Diictodon		Frobisch sheet 2015	Antjiesfontein, Leeukraal 24, Prince Albert		0.125	0.125
BP/1/290	290	ESI	Dicynodontia	Pylaecephalidae	Diictodon		Frobisch sheet 2015	Antjiesfontein, Leeukraal 24, Prince Albert		0.125	0.125
BP/1/291	291	ESI	Dicynodontia	Pylaecephalidae	Diictodon		Frobisch sheet 2015	Antjiesfontein, Leeukraal 24, Prince Albert		0.125	0.125
BP/1/293	293	ESI	Dicynodontia	Pylaecephalidae	Diictodon		Frobisch sheet 2015	Antjiesfontein, Leeukraal 24, Prince Albert		0.125	0.125
BP/1/294	294	ESI	Dicynodontia	Pylaecephalidae	Diictodon		Frobisch sheet 2015	Kleinwaterval, Spreeuw Fontein 26, Prince Albert		0.0833333	0.0833333
BP/1/295	295	ESI	Dicynodontia	Pylaecephalidae	Diictodon		Frobisch sheet 2015	Kleinwaterval, Spreeuw Fontein 26, Prince Albert		0.0833333	0.0833333
BP/1/296	296	ESI	Dicynodontia	Pylaecephalidae	Diictodon		Frobisch sheet 2015	Kleinwaterval, Spreeuw Fontein 26, Prince Albert		0.0833333	0.0833333
BP/1/5038	5038	ESI	Dicynodontia	Pylaecephalidae	Diictodon		Ken Angielczyk	Honing Leegte 313, Beaufort West		0.333333
BP/1/6990	6990	ESI	Dicynodontia	Pylaecephalidae	Diictodon		Angielczyk ESI catalogue	Celeryfontein, Sellery Fontein 426, Fraserburg				1
BP/1/7077	7077	ESI	Dicynodontia	Pylaecephalidae	Diictodon		Angielczyk ESI catalogue	Goeiemoed 90, Prince Albert		0.125	0.125
BP/1/7087	7087	ESI	Dicynodontia	Pylaecephalidae	Diictodon?		Angielczyk ESI catalogue	Springfontein, Rondom 247, Baufort West					1
BP/1/7088	7088	ESI	Dicynodontia	Pylaecephalidae	Diictodon?		Angielczyk ESI catalogue	Springfontein, Rondom 247, Baufort West					1
BP/1/7089	7089	ESI	Dicynodontia	Pylaecephalidae	Diictodon		Angielczyk ESI catalogue	Springfontein, Rondom 247, Baufort West					1
BP/1/7101	7101	ESI	Dicynodontia	Pylaecephalidae	Diictodon		Angielczyk ESI catalogue	Overse Fontein 249, Beaufort West					1
BP/1/7105	7105	ESI	Dicynodontia	Pylaecephalidae	Diictodon		Angielczyk ESI catalogue	Springfontein, Rondom 247, Baufort West				1
BP/1/7171	7171	ESI	Dicynodontia	Pylaecephalidae	Diictodon		M Day 2016	Muggefontein, farm 404, Beaufort West								1
BP/1/7191	7191	ESI	Dicynodontia	Pylaecephalidae	Diictodon?		Angielczyk ESI catalogue	Puntkraal, Uitvlug 90, Sutherland					1
BP/1/7201	7201	ESI	Dicynodontia	Pylaecephalidae	Diictodon		Angielczyk ESI catalogue	Puntkraal, Uitvlug 90, Sutherland				1
BP/1/7209	7209	ESI	Dicynodontia	Pylaecephalidae	Diictodon		CFK 31-08-2015	Puntkraal, Uitvlug 90, Sutherland					1
BP/1/7210	7210	ESI	Dicynodontia	Pylaecephalidae	Diictodon		CFK 31-08-2015	Puntkraal, Uitvlug 90, Sutherland					1
BP/1/7211	7211	ESI	Dicynodontia	Pylaecephalidae	Diictodon		CFK 31-08-2015	Puntkraal, Uitvlug 90, Sutherland					1
BP/1/7226	7226	ESI	Dicynodontia	Pylaecephalidae	Diictodon		J Frobisch	Puntkraal, Uitvlug 90, Sutherland					1
BP/1/7228	7228	ESI	Dicynodontia	Pylaecephalidae	Diictodon?		M Day	Prinshof, Bastards Berg 35, Sutherland				1
BP/1/7229	7229	ESI	Dicynodontia	Pylaecephalidae	Diictodon		M Day; J Frobisch	Puntkraal, Uitvlug 90, Sutherland					1
BP/1/7232	7232	ESI	Dicynodontia	Pylaecephalidae	Diictodon		M Day; J Frobisch	Puntkraal, Uitvlug 90, Sutherland			1
BP/1/7233	7233	ESI	Dicynodontia	Pylaecephalidae	Diictodon		J Frobisch	Puntkraal, Uitvlug 90, Sutherland						1
BP/1/7237	7237	ESI	Dicynodontia	Pylaecephalidae	Diictodon?		M Day	Puntkraal, Uitvlug 90, Sutherland				1
BP/1/7262	7262	ESI	Dicynodontia	Pylaecephalidae	Diictodon		Ken Angielczyk	Losberg1, Blaauwkrans 216, Beaufort West						1
BP/1/7278	7278	ESI	Dicynodontia	Pylaecephalidae	Diictodon?		R Smith	Losberg1, Blaauwkrans 216, Beaufort West						1
BP/1/7282	7282	ESI	Dicynodontia	Pylaecephalidae	Diictodon		Frobisch	Brakleegte 297/Wolwehoek, Hendriks Kraal 298, Beaufort West					1
BP/1/7286	7286	ESI	Dicynodontia	Pylaecephalidae	Diictodon		M Day 2016	Brakleegte 297/Wolwehoek, Hendriks Kraal 298, Beaufort West						1
BP/1/7288	7288	ESI	Dicynodontia	Pylaecephalidae	Diictodon		Ken Angielczyk	Brakleegte 297/Wolwehoek, Hendriks Kraal 298, Beaufort West		1
BP/1/7299	7299	ESI	Dicynodontia	Pylaecephalidae	Diictodon		M Day 2016	Weltevrede Wes 172, Beaufort West					1
BP/1/7302	7302	ESI	Dicynodontia	Pylaecephalidae	Diictodon		Frobisch	Brakleegte 297/Wolwehoek, Hendriks Kraal 298, Beaufort West				1
BP/1/7303	7303	ESI	Dicynodontia	Pylaecephalidae	Diictodon		M Day 2016	Brakleegte 297/Wolwehoek, Hendriks Kraal 298, Beaufort West					1
BP/1/7304	7304	ESI	Dicynodontia	Pylaecephalidae	cf. Diictodon		M Day 2016	Weltevrede Wes 172, Beaufort West					1
BP/1/7305	7305	ESI	Dicynodontia	Pylaecephalidae	cf. Diictodon		M Day 2016	Brakleegte 297/Wolwehoek, Hendriks Kraal 298, Beaufort West					1
BP/1/7308	7308	ESI	Dicynodontia	Pylaecephalidae	Diictodon		Ken Angielczyk	Losberg1, Blaauwkrans 216, Beaufort West							1
BP/1/7309	7309	ESI	Dicynodontia	Pylaecephalidae	Diictodon		Frobisch	Weltevrede Wes 172, Beaufort West					1
BP/1/7310	7310	ESI	Dicynodontia	Pylaecephalidae	Diictodon?		Ken Angielczyk	Losberg1, Blaauwkrans 216, Beaufort West						1
BP/1/7311	7311	ESI	Dicynodontia	Pylaecephalidae	Diictodon		Ken Angielczyk	Brakleegte 297/Wolwehoek, Hendriks Kraal 298, Beaufort West					1
BP/1/7313	7313	ESI	Dicynodontia	Pylaecephalidae	cf. Diictodon		M Day 2016	Brakleegte 297/Wolwehoek, Hendriks Kraal 298, Beaufort West					1
BP/1/7315	7315	ESI	Dicynodontia	Pylaecephalidae	Diictodon?		Rubidge ESI catalogue	Losberg1, Blaauwkrans 216, Beaufort West						1
BP/1/7316	7316	ESI	Dicynodontia	Pylaecephalidae	cf. Diictodon		M Day 2016	Brakleegte 297/Wolwehoek, Hendriks Kraal 298, Beaufort West					1
BP/1/7317	7317	ESI	Dicynodontia	Pylaecephalidae	cf. Diictodon		M Day 2016	Losberg1, Blaauwkrans 216, Beaufort West						1
BP/1/7318	7318	ESI	Dicynodontia	Pylaecephalidae	cf. Diictodon		Ken Angielczyk	Brakleegte 297/Wolwehoek, Hendriks Kraal 298, Beaufort West				1
BP/1/7321	7321	ESI	Dicynodontia	Pylaecephalidae	cf. Diictodon		M Day 2016	Brakleegte 297/Wolwehoek, Hendriks Kraal 298, Beaufort West				1
BP/1/7322	7322	ESI	Dicynodontia	Pylaecephalidae	cf. Diictodon		M Day 2016	Brakleegte 297/Wolwehoek, Hendriks Kraal 298, Beaufort West				1
BP/1/7323	7323	ESI	Dicynodontia	Pylaecephalidae	Diictodon		M Day 2016	Brakleegte 297/Wolwehoek, Hendriks Kraal 298, Beaufort West					1
BP/1/7347	7347	ESI	Dicynodontia	Pylaecephalidae	Diictodon		Frobisch	Brakleegte 297/Wolwehoek, Hendriks Kraal 298, Beaufort West						1
BP/1/7354	7354	ESI	Dicynodontia	Pylaecephalidae	Diictodon		M Day 2016	Losberg1, Blaauwkrans 216, Beaufort West						1
BP/1/7355	7355	ESI	Dicynodontia	Pylaecephalidae	Diictodon		M Day 2016	Losberg1, Blaauwkrans 216, Beaufort West						1
BP/1/7357	7357	ESI	Dicynodontia	Pylaecephalidae	Diictodon		M Day 2016	Brakleegte 297/Wolwehoek, Hendriks Kraal 298, Beaufort West		1
BP/1/7369	7369	ESI	Dicynodontia	Pylaecephalidae	Diictodon		M Day 2016	Brakleegte 297/Wolwehoek, Hendriks Kraal 298, Beaufort West			1
BP/1/7370	7370	ESI	Dicynodontia	Pylaecephalidae	cf. Diictodon		Ken Angielczyk	Losberg1, Blaauwkrans 216, Beaufort West						1
BP/1/7381	7381	ESI	Dicynodontia	Pylaecephalidae	cf. Diictodon		Ken Angielczyk	Brakleegte 297/Wolwehoek, Hendriks Kraal 298, Beaufort West					1
BP/1/7384	7384	ESI	Dicynodontia	Pylaecephalidae	cf. Diictodon		M Day 2016	Weltevrede Wes 172, Beaufort West					1
BP/1/7385	7385	ESI	Dicynodontia	Pylaecephalidae	cf. Diictodon		Ken Angielczyk	Losberg1, Blaauwkrans 216, Beaufort West						1
BP/1/7386	7386	ESI	Dicynodontia	Pylaecephalidae	cf. Diictodon		M Day 2016	Brakleegte 297/Wolwehoek, Hendriks Kraal 298, Beaufort West			1
BP/1/7399	7399	ESI	Dicynodontia	Pylaecephalidae	cf. Diictodon		Ken Angielczyk	Losberg1, Blaauwkrans 216, Beaufort West						1
BP/1/7402	7402	ESI	Dicynodontia	Pylaecephalidae	Diictodon		Rubidge ESI catalogue	Brakleegte 297/Wolwehoek, Hendriks Kraal 298, Beaufort West					1
BP/1/7406	7406	ESI	Dicynodontia	Pylaecephalidae	Diictodon		Ken Angielczyk	Losberg1, Blaauwkrans 216, Beaufort West						1
BP/1/7407	7407	ESI	Dicynodontia	Pylaecephalidae	Diictodon		M Day 2016	Brakleegte 297/Wolwehoek, Hendriks Kraal 298, Beaufort West					1
BP/1/7459	7459	ESI	Dicynodontia	Pylaecephalidae	Diictodon		M Day 2016	Muggefontein, farm 404, Beaufort West								1
BP/1/7464	7464	ESI	Dicynodontia	Pylaecephalidae	Diictodon		M Day 2016	Losberg1, Blaauwkrans 216, Beaufort West						1
BP/1/7466	7466	ESI	Dicynodontia	Pylaecephalidae	cf. Diictodon		M Day 2016	Weltevrede Wes 172, Beaufort West					1
BP/1/7467	7467	ESI	Dicynodontia	Pylaecephalidae	Diictodon		M Day 2016	Losberg1, Blaauwkrans 216, Beaufort West						1
BP/1/7468	7468	ESI	Dicynodontia	Pylaecephalidae	Diictodon		M Day 2016	Weltevrede Wes 172, Beaufort West					1
BP/1/7470	7470	ESI	Dicynodontia	Pylaecephalidae	Diictodon		M Day 2016	Weltevrede Wes 172, Beaufort West					1
BP/1/7471	7471	ESI	Dicynodontia	Pylaecephalidae	cf. Diictodon		M Day 2016	Losberg1, Blaauwkrans 216, Beaufort West						1
BP/1/7472	7472	ESI	Dicynodontia	Pylaecephalidae	Diictodon		M Day 2016	Losberg1, Blaauwkrans 216, Beaufort West						1
BP/1/7477	7477	ESI	Dicynodontia	Pylaecephalidae	cf. Diictodon		M Day 2016	Muggefontein, farm 404, Beaufort West								1
BP/1/7479	7479	ESI	Dicynodontia	Pylaecephalidae	Diictodon		M Day 2016	Muggefontein, farm 404, Beaufort West								1
BP/1/7480	7480	ESI	Dicynodontia	Pylaecephalidae	cf. Diictodon		M Day 2016	Muggefontein, farm 404, Beaufort West				1
BP/1/7481	7481	ESI	Dicynodontia	Pylaecephalidae	Diictodon		M Day 2016	Muggefontein, farm 404, Beaufort West								1
BP/1/7482	7482	ESI	Dicynodontia	Pylaecephalidae	cf. Diictodon		M Day 2016	Muggefontein, farm 404, Beaufort West				1
BP/1/7484	7484	ESI	Dicynodontia	Pylaecephalidae	Diictodon		M Day 2016	Muggefontein, farm 404, Beaufort West								1
BP/1/7485	7485	ESI	Dicynodontia	Pylaecephalidae	Diictodon		M Day 2016	Muggefontein, farm 404, Beaufort West					1
BP/1/7486	7486	ESI	Dicynodontia	Pylaecephalidae	Diictodon		M Day 2016	Muggefontein, farm 404, Beaufort West								1
BP/1/7487	7487	ESI	Dicynodontia	Pylaecephalidae	cf. Diictodon		M Day 2016	Muggefontein, farm 404, Beaufort West						1
BP/1/7488	7488	ESI	Dicynodontia	Pylaecephalidae	Diictodon		M Day 2016	Muggefontein, farm 404, Beaufort West								1
BP/1/7489	7489	ESI	Dicynodontia	Pylaecephalidae	Diictodon		M Day 2016	Muggefontein, farm 404, Beaufort West						1
BP/1/7490	7490	ESI	Dicynodontia	Pylaecephalidae	cf. Diictodon		M Day 2016	Muggefontein, farm 404, Beaufort West								1
BP/1/7491	7491	ESI	Dicynodontia	Pylaecephalidae	Diictodon		B. Rubidge	Muggefontein, farm 404, Beaufort West				1
BP/1/7496	7496	ESI	Dicynodontia	Pylaecephalidae	Diictodon		M Day 2016	Muggefontein, farm 404, Beaufort West								1
BP/1/7497	7497	ESI	Dicynodontia	Pylaecephalidae	Diictodon		M Day 2016	Muggefontein, farm 404, Beaufort West								1
BP/1/7498	7498	ESI	Dicynodontia	Pylaecephalidae	cf. Diictodon		M Day 2016	Muggefontein, farm 404, Beaufort West				1
BP/1/7501	7501	ESI	Dicynodontia	Pylaecephalidae	Diictodon		M Day 2016	Muggefontein, farm 404, Beaufort West								1
BP/1/7502	7502	ESI	Dicynodontia	Pylaecephalidae	Diictodon		M Day 2016	Muggefontein, farm 404, Beaufort West						1
BP/1/7503	7503	ESI	Dicynodontia	Pylaecephalidae	Diictodon		B. Rubidge	Muggefontein, farm 404, Beaufort West								1
BP/1/7504	7504	ESI	Dicynodontia	Pylaecephalidae	Diictodon		M Day 2016	Muggefontein, farm 404, Beaufort West								1
BP/1/7505	7505	ESI	Dicynodontia	Pylaecephalidae	Diictodon		M Day 2016	Muggefontein, farm 404, Beaufort West								1
BP/1/7508	7508	ESI	Dicynodontia	Pylaecephalidae	cf. Diictodon		M Day 2016	Muggefontein, farm 404, Beaufort West						1
BP/1/7509	7509	ESI	Dicynodontia	Pylaecephalidae	Diictodon		Ken Angielczyk	Muggefontein, farm 404, Beaufort West					1
BP/1/7511	7511	ESI	Dicynodontia	Pylaecephalidae	cf. Diictodon		M Day 2016	Muggefontein, farm 404, Beaufort West								1
BP/1/7512	7512	ESI	Dicynodontia	Pylaecephalidae	Diictodon		M Day 2016	Muggefontein, farm 404, Beaufort West							1
BP/1/7513	7513	ESI	Dicynodontia	Pylaecephalidae	Diictodon		B. Rubidge	Muggefontein, farm 404, Beaufort West								1
BP/1/7515	7515	ESI	Dicynodontia	Pylaecephalidae	cf. Diictodon		M Day 2016	Muggefontein, farm 404, Beaufort West								1
BP/1/7516	7516	ESI	Dicynodontia	Pylaecephalidae	Diictodon		B. Rubidge	Muggefontein, farm 404, Beaufort West								1
BP/1/7517	7517	ESI	Dicynodontia	Pylaecephalidae	Diictodon		M Day 2016	Muggefontein, farm 404, Beaufort West								1
BP/1/7518	7518	ESI	Dicynodontia	Pylaecephalidae	Diictodon		M Day 2016	Muggefontein, farm 404, Beaufort West								1
BP/1/7519	7519	ESI	Dicynodontia	Pylaecephalidae	Diictodon		M Day 2016	Muggefontein, farm 404, Beaufort West								1
BP/1/7520	7520	ESI	Dicynodontia	Pylaecephalidae	Diictodon		M Day 2016	Muggefontein, farm 404, Beaufort West								1
BP/1/7521	7521	ESI	Dicynodontia	Pylaecephalidae	Diictodon		M Day 2016	Muggefontein, farm 404, Beaufort West						1
BP/1/7522	7522	ESI	Dicynodontia	Pylaecephalidae	Diictodon		M Day 2016	Muggefontein, farm 404, Beaufort West								1
BP/1/7523	7523	ESI	Dicynodontia	Pylaecephalidae	Diictodon		M Day 2016	Muggefontein, farm 404, Beaufort West					1
BP/1/7524	7524	ESI	Dicynodontia	Pylaecephalidae	Diictodon		M Day 2016	Muggefontein, farm 404, Beaufort West								1
BP/1/7525	7525	ESI	Dicynodontia	Pylaecephalidae	cf. Diictodon		M Day 2016	Muggefontein, farm 404, Beaufort West								1
BP/1/7526	7526	ESI	Dicynodontia	Pylaecephalidae	Diictodon		M Day 2016	Muggefontein, farm 404, Beaufort West						1
BP/1/7529	7529	ESI	Dicynodontia	Pylaecephalidae	Diictodon		M Day 2016	Muggefontein, farm 404, Beaufort West				1
BP/1/7531	7531	ESI	Dicynodontia	Pylaecephalidae	Dictodon		Ken Angielczyk	Muggefontein, farm 404, Beaufort West							1
BP/1/7534	7534	ESI	Dicynodontia	Pylaecephalidae	Diictodon?		Ken Angielczyk	Muggefontein, farm 404, Beaufort West						1
BP/1/7537	7537	ESI	Dicynodontia	Pylaecephalidae	Diictodon		M Day 2016	Muggefontein, farm 404, Beaufort West								1
BP/1/7538	7538	ESI	Dicynodontia	Pylaecephalidae	Diictodon		M Day 2016	Muggefontein, farm 404, Beaufort West						1
BP/1/7541	7541	ESI	Dicynodontia	Pylaecephalidae	cf. Diictodon		M Day 2016	Muggefontein, farm 404, Beaufort West					1
BP/1/7545	7545	ESI	Dicynodontia	Pylaecephalidae	cf. Diictodon		M Day 2016	Muggefontein, farm 404, Beaufort West								1
BP/1/7546	7546	ESI	Dicynodontia	Pylaecephalidae	cf. Diictodon		M Day 2016	Muggefontein, farm 404, Beaufort West				1
BP/1/7549	7549	ESI	Dicynodontia	Pylaecephalidae	Diictodon		M Day 2016	Muggefontein, farm 404, Beaufort West			1
BP/1/7550	7550	ESI	Dicynodontia	Pylaecephalidae	Diictodon		M Day 2016	Muggefontein, farm 404, Beaufort West								1
BP/1/7581	7581	ESI	Dicynodontia	Pylaecephalidae	cf. Diictodon		Ken Angielczyk	Muggefontein, farm 404, Beaufort West					1
BP/1/7583B	7583B	ESI	Dicynodontia	Pylaecephalidae	Diictodon		Ken Angielczyk	Muggefontein, farm 404, Beaufort West								1
BP/1/7593	7593	ESI	Dicynodontia	Pylaecephalidae	Diictodon?		M Day 2016	Muggefontein, farm 404, Beaufort West					1
BP/1/7596	7596	ESI	Dicynodontia	Pylaecephalidae	Diictodon		M Day 2016	Muggefontein, farm 404, Beaufort West					1
BP/1/7597	7597	ESI	Dicynodontia	Pylaecephalidae	Diictodon?		Ken Angielczyk	Muggefontein, farm 404, Beaufort West					1
BP/1/7598	7598	ESI	Dicynodontia	Pylaecephalidae	Diictodon		M Day 2016	Muggefontein, farm 404, Beaufort West					1
BP/1/7601	7601	ESI	Dicynodontia	Pylaecephalidae	cf. Diictodon		M Day 2016	Muggefontein, farm 404, Beaufort West					1
BP/1/7603	7603	ESI	Dicynodontia	Pylaecephalidae	Diictodon		B. Rubidge/ Ken Angielczyk	Muggefontein, farm 404, Beaufort West				1
BP/1/7604	7604	ESI	Dicynodontia	Pylaecephalidae	Diictodon		M Day 2016	Muggefontein, farm 404, Beaufort West				1
BP/1/7610	7610	ESI	Dicynodontia	Pylaecephalidae	Diictodon		M Day 2016	Muggefontein, farm 404, Beaufort West								1
BP/1/7611	7611	ESI	Dicynodontia	Pylaecephalidae	Diictodon		B. Rubidge/Kenneth Angielczyk	Hendriks Kraal 298, Beaufort West					1
BP/1/7612	7612	ESI	Dicynodontia	Pylaecephalidae	Diictodon		M Day 2016	Muggefontein, farm 404, Beaufort West								1
BP/1/7625	7625	ESI	Dicynodontia	Pylaecephalidae	Diictodon		M Day 2016	Muggefontein, farm 404, Beaufort West								1
BP/1/7627	7627	ESI	Dicynodontia	Pylaecephalidae	Diictodon		M Day 2016	Muggefontein, farm 404, Beaufort West								1
BP/1/7628	7628	ESI	Dicynodontia	Pylaecephalidae	Diictodon		Ken Angielczyk	Muggefontein, farm 404, Beaufort West						1
BP/1/7630	7630	ESI	Dicynodontia	Pylaecephalidae	cf. Diictodon		M Day 2016	Muggefontein, farm 404, Beaufort West					1
BP/1/7633	7633	ESI	Dicynodontia	Pylaecephalidae	Diictodon		M Day 2016	Muggefontein, farm 404, Beaufort West					1
BP/1/7637	7637	ESI	Dicynodontia	Pylaecephalidae	Diictodon		M Day 2016	Muggefontein, farm 404, Beaufort West								1
BP/1/7639	7639	ESI	Dicynodontia	Pylaecephalidae	Diictodon		M Day 2016	Muggefontein, farm 404, Beaufort West								1
BP/1/7640	7640	ESI	Dicynodontia	Pylaecephalidae	Diictodon		M Day 2016	Muggefontein, farm 404, Beaufort West							1
BP/1/7669	7669	ESI	Dicynodontia	Pylaecephalidae	cf. Diictodon		M Day 2016	Tierhoek, Tygerhoek 468, Fraserburg					1
BP/1/7670	7670	ESI	Dicynodontia	Pylaecephalidae	Diictodon		M Day 2016	Muggefontein, farm 404, Beaufort West					1
BP/1/7672	7672	ESI	Dicynodontia	Pylaecephalidae	cf. Diictodon		M Day 2016	Tierhoek, Tygerhoek 468, Fraserburg					1
BP/1/7673	7673	ESI	Dicynodontia	Pylaecephalidae	cf. Diictodon		M Day 2016	Spinnekopkraal 466, Fraserburg							1
BP/1/7674	7674	ESI	Dicynodontia	Pylaecephalidae	Diictodon		M Day 2016	Spinnekopkraal 466, Fraserburg					1
BP/1/7677	7677	ESI	Dicynodontia	Pylaecephalidae	Diictodon		M Day 2016	Spinnekopkraal 466, Fraserburg							1
BP/1/7680	7680	ESI	Dicynodontia	Pylaecephalidae	Diictodon		M Day 2016	Spinnekopkraal 466, Fraserburg							1
BP/1/7681	7681	ESI	Dicynodontia	Pylaecephalidae	Diictodon		M Day 2016	Tierhoek, Tygerhoek 468, Fraserburg				1
BP/1/7682	7682	ESI	Dicynodontia	Pylaecephalidae	cf. Diictodon		M Day 2016	Muggefontein, farm 404, Beaufort West					1
BP/1/7683	7683	ESI	Dicynodontia	Pylaecephalidae	Diictodon		M Day 2016	Spinnekopkraal 466, Fraserburg							1
BP/1/7684	7684	ESI	Dicynodontia	Pylaecephalidae	Diictodon		M Day 2016	Spinnekopkraal 466, Fraserburg							1
BP/1/7694	7694	ESI	Dicynodontia	Pylaecephalidae	Diictodon		M Day 2016	Spinnekopkraal 466, Fraserburg							1
BP/1/7696	7696	ESI	Dicynodontia	Pylaecephalidae	cf. Diictodon		M Day 2016	Tierhoek, Tygerhoek 468, Fraserburg					1
BP/1/7697	7697	ESI	Dicynodontia	Pylaecephalidae	cf. Diictodon		M Day 2016	Spinnekopkraal 466, Fraserburg							1
BP/1/7703	7703	ESI	Dicynodontia	Pylaecephalidae	Diictodon		M Day 2016	Spinnekopkraal 466, Fraserburg							1
BP/1/7704	7704	ESI	Dicynodontia	Pylaecephalidae	cf. Diictodon		M Day 2016	Spinnekopkraal 466, Fraserburg								1
BP/1/7708	7708	ESI	Dicynodontia	Pylaecephalidae	Diictodon		M Day 2016	Spinnekopkraal 466, Fraserburg							1
BP/1/7710	7710	ESI	Dicynodontia	Pylaecephalidae	Diictodon		M Day 2016	Spinnekopkraal 466, Fraserburg							1
BP/1/7712	7712	ESI	Dicynodontia	Pylaecephalidae	cf. Diictodon		M Day 2016	Spinnekopkraal 466, Fraserburg							1
BP/1/7715	7715	ESI	Dicynodontia	Pylaecephalidae	Diictodon		M Day 2016	Spinnekopkraal 466, Fraserburg							1
BP/1/7716	7716	ESI	Dicynodontia	Pylaecephalidae	cf. Diictodon		M Day 2016	Tierhoek, Tygerhoek 468, Fraserburg					1
BP/1/7719	7719	ESI	Dicynodontia	Pylaecephalidae	cf. Diictodon		M Day 2016	Tierhoek, Tygerhoek 468, Fraserburg					1
BP/1/7721	7721	ESI	Dicynodontia	Pylaecephalidae	cf. Diictodon		M Day 2016	Tierhoek, Tygerhoek 468, Fraserburg				1
BP/1/7724	7724	ESI	Dicynodontia	Pylaecephalidae	Diictodon		M Day 2016	Spinnekopkraal 466, Fraserburg							1
BP/1/7730	7730	ESI	Dicynodontia	Pylaecephalidae	cf. Diictodon		M Day 2016	Spinnekopkraal 466, Fraserburg					1
BP/1/7733	7733	ESI	Dicynodontia	Pylaecephalidae	Diictodon		M Day 2016	Tierhoek, Tygerhoek 468, Fraserburg					1
BP/1/7734	7734	ESI	Dicynodontia	Pylaecephalidae	Diictodon		M Day 2016	Tierhoek, Tygerhoek 468, Fraserburg					1
BP/1/7735	7735	ESI	Dicynodontia	Pylaecephalidae	Diictodon		M Day 2016	Spinnekopkraal 466, Fraserburg							1
BP/1/7743	7743	ESI	Dicynodontia	Pylaecephalidae	Diictodon		B.S.Rubidge/ Ken Angielczyk	Tierhoek, Tygerhoek 468, Fraserburg					1
BP/1/7757	7757	ESI	Dicynodontia	Pylaecephalidae	cf. Diictodon		M Day 2016	Spinnekopkraal 466, Fraserburg							1
BP/1/7758	7758	ESI	Dicynodontia	Pylaecephalidae	Diictodon		B.S.Rubidge/Ken Angielczyk	Spinnekopkraal 466, Fraserburg							1
BP/1/7759	7759	ESI	Dicynodontia	Pylaecephalidae	Diictodon		B.S.Rubidge/Ken Angielczyk	Spinnekopkraal 466, Fraserburg							1
BP/1/7762	7762	ESI	Dicynodontia	Pylaecephalidae	cf. Diictodon		M Day 2016	Spinnekopkraal 466, Fraserburg					1
BP/1/7763	7763	ESI	Dicynodontia	Pylaecephalidae	Diictodon		B.S.Rubidge/Ken Angielczyk	Spinnekopkraal 466, Fraserburg							1
BP/1/7766	7766	ESI	Dicynodontia	Pylaecephalidae	cf. Diictodon		M Day 2016	Spinnekopkraal 466, Fraserburg							1
BP/1/7772	7772	ESI	Dicynodontia	Pylaecephalidae	Diictodon		M Day 2016	Spinnekopkraal 466, Fraserburg							1
BP/1/7783	7783	ESI	Dicynodontia	Pylaecephalidae	Diictodon		M Day 2016	Tierhoek, Tygerhoek 468, Fraserburg					1
BP/1/7785	7785	ESI	Dicynodontia	Pylaecephalidae	Diictodon		B.S.Rubidge/Ken Angielczyk	Tierhoek, Tygerhoek 468, Fraserburg				1
BP/1/7793	7793	ESI	Dicynodontia	Pylaecephalidae	Diictodon		M Day 2016	Spinnekopkraal 466, Fraserburg							1
C53	53	CGS	Dicynodontia	Pylaecephalidae	Diictodon	feliceps	Frobisch and Kammerer pers. comm. 2015	Tierhoek, Tygerhoek 468, Fraserburg				1
C56	56	CGS	Dicynodontia	Pylaecephalidae	Diictodon	feliceps	Frobisch and Kammerer pers. comm. 2015	Tierhoek, Tygerhoek 468, Fraserburg				1
C57	57	CGS	Dicynodontia	Pylaecephalidae	Diictodon	feliceps	Frobisch and Kammerer pers. comm. 2015	Tierhoek, Tygerhoek 468, Fraserburg				1
C58	58	CGS	Dicynodontia	Pylaecephalidae	Diictodon	feliceps	Frobisch and Kammerer pers. comm. 2015	Tierhoek, Tygerhoek 468, Fraserburg				1
C62	62	CGS	Dicynodontia	Pylaecephalidae	Diictodon	feliceps	Frobisch and Kammerer pers. comm. 2015	Tierhoek, Tygerhoek 468, Fraserburg				1
cdb56		CGS	Dicynodontia	Pylaecephalidae	Diictodon		Frobish sheet 2015	Grootwamakersvlei 304, Fraserburg		0.333333
F155		CGS	Dicynodontia	Pylaecephalidae	Diictodon		Frobish sheet 2015	Puntkraal, Uitvlugt 90, Sutherland				1
RD100		CGS	Dicynodontia	Pylaecephalidae	Diictodon		Frobish sheet 2015	Platfontein 28, Beaufort West							1
RD101		CGS	Dicynodontia	Pylaecephalidae	Diictodon		Frobish sheet 2015	Platfontein 28, Beaufort West							1
RD102		CGS	Dicynodontia	Pylaecephalidae	Diictodon		Frobish sheet 2015	Platfontein 28, Beaufort West							1
RD103		CGS	Dicynodontia	Pylaecephalidae	Diictodon		Frobish sheet 2015	Platfontein 28, Beaufort West							1
RD104		CGS	Dicynodontia	Pylaecephalidae	Diictodon		Frobish sheet 2015	Platfontein 28, Beaufort West							1
RD105		CGS	Dicynodontia	Pylaecephalidae	Diictodon		Frobish sheet 2015	Platfontein 28, Beaufort West							1
RD107		CGS	Dicynodontia	Pylaecephalidae	Diictodon		Frobish sheet 2015	Platfontein 28, Beaufort West							1
RD108		CGS	Dicynodontia	Pylaecephalidae	Diictodon		Frobish sheet 2015	Platfontein 28, Beaufort West							1
RD109		CGS	Dicynodontia	Pylaecephalidae	Diictodon		Frobish sheet 2015	Platfontein 28, Beaufort West							1
RD113		CGS	Dicynodontia	Pylaecephalidae	Diictodon		Frobish sheet 2015	Platfontein 28, Beaufort West							1
RD114		CGS	Dicynodontia	Pylaecephalidae	Diictodon		Frobish sheet 2015	Platfontein 28, Beaufort West							1
rd117		CGS	Dicynodontia	Pylaecephalidae	Diictodon		Frobish sheet 2015	Kalkfontein 335, Fraserburg						0.5	0.5
rd18		CGS	Dicynodontia	Pylaecephalidae	Diictodon		Frobish sheet 2015	Platfontein 28, Beaufort West							1
rd19		CGS	Dicynodontia	Pylaecephalidae	Diictodon		Frobish sheet 2015	Platfontein 28, Beaufort West							1
rd20		CGS	Dicynodontia	Pylaecephalidae	Diictodon		Frobish sheet 2015	Platfontein 28, Beaufort West							1
rd22		CGS	Dicynodontia	Pylaecephalidae	Diictodon		Frobish sheet 2015	Platfontein 28, Beaufort West							1
rd23		CGS	Dicynodontia	Pylaecephalidae	Diictodon		Frobish sheet 2015	Platfontein 28, Beaufort West							1
rd24		CGS	Dicynodontia	Pylaecephalidae	Diictodon		Frobish sheet 2015	Platfontein 28, Beaufort West							1
rd25		CGS	Dicynodontia	Pylaecephalidae	Diictodon		Frobish sheet 2015	Platfontein 28, Beaufort West							1
rd26		CGS	Dicynodontia	Pylaecephalidae	Diictodon		Frobish sheet 2015	Platfontein 28, Beaufort West							1
rd27		CGS	Dicynodontia	Pylaecephalidae	Diictodon		Frobish sheet 2015	Platfontein 28, Beaufort West							1
rd28		CGS	Dicynodontia	Pylaecephalidae	Diictodon		Frobish sheet 2015	Platfontein 28, Beaufort West							1
rd29		CGS	Dicynodontia	Pylaecephalidae	Diictodon		Frobish sheet 2015	Platfontein 28, Beaufort West							1
rd31		CGS	Dicynodontia	Pylaecephalidae	Diictodon		Frobish sheet 2015	Platfontein 28, Beaufort West							1
rd33		CGS	Dicynodontia	Pylaecephalidae	Diictodon	feliceps	Frobisch and Kammerer pers. comm. 2015	Platfontein 28, Beaufort West								1
RS367	367	CGS	Dicynodontia	Pylaecephalidae	Diictodon		Frobisch sheet 2015	Grootfontein 180, Beaufort West						1
RS419		CGS	Dicynodontia	Pylaecephalidae	Diictodon		Frobisch sheet 2015	Klipplaats Fontein (Hartebeesvlei's Berg) 210, Beaufort West				1
SAM-PK-000695		SAM	Dicynodontia	Pylaecephalidae	Diictodon		Frobisch sheet 2015	Lombardskraal 330, Beaufort West		0.2	0.2	0.2	0.2	0.2
SAM-PK-011800		SAM	Dicynodontia	Pylaecephalidae	Diictodon		Day	Dubbelsfontein, Kaffirs Kraal 380, Beaufort West		0.1	0.1	0.1	0.1
SAM-PK-011806		SAM	Dicynodontia	Pylaecephalidae	Diictodon		Day	Dubbelsfontein, Kaffirs Kraal 380, Beaufort West		0.1	0.1	0.1	0.1
SAM-PK-011808		SAM	Dicynodontia	Pylaecephalidae	Diictodon		Day	Dubbelsfontein, Kaffirs Kraal 380, Beaufort West		0.1	0.1	0.1	0.1
SAM-PK-011814		SAM	Dicynodontia	Pylaecephalidae	Diictodon		Day	Dubbelsfontein, Kaffirs Kraal 380, Beaufort West		0.1	0.1	0.1	0.1
SAM-PK-011815		SAM	Dicynodontia	Pylaecephalidae	Diictodon		Day	Dubbelsfontein, Kaffirs Kraal 380, Beaufort West		0.1	0.1	0.1	0.1
SAM-PK-011820		SAM	Dicynodontia	Pylaecephalidae	Diictodon		Day	Dubbelsfontein, Kaffirs Kraal 380, Beaufort West		0.1	0.1	0.1	0.1
SAM-PK-011885		SAM	Dicynodontia	Pylaecephalidae	Diictodon?		M Day 2015	Mechaus Request 242, Beaufort West		0.25	0.25	0.25
SAM-PK-012258		SAM	Dicynodontia	Pylaecephalidae	Diictodon		Frobish sheet 2015	Beukesplaas, Gannakraal 422, Fraserburg			0.5	0.5
SAM-PK-K06818		SAM	Dicynodontia	Pylaecephalidae	Diictodon		Frobisch sheet 2015	Matjes Kloof 235, Beaufort West				0.166667	0.166667	0.166667	0.166667	0.166667
SAM-PK-K07603	K07603	SAM	Dicynodontia	Pylaecephalidae	Diictodon		Frobisch sheet 2015	Leeurivier, Rietfontein 306, Beaufort West		0.333333
SAM-PK-K07643		SAM	Dicynodontia	Pylaecephalidae	Diictodon		Frobisch sheet 2015	La-de-da 178, Beaufort West		0.166667	0.166667	0.166667	0.166667	0.166667	0.166667
SAM-PK-K07652		SAM	Dicynodontia	Pylaecephalidae	Diictodon?		Day				0.166667	0.166667	0.166667	0.166667	0.166667	0.166667
SAM-PK-K10108		SAM	Dicynodontia	Pylaecephalidae	Diictodon		CFK 31-08-2015	Farm 185, Beaufort West							1
TM 361		TM	Dicynodontia	Pylaecephalidae	Diictodon		Frobisch sheet 2015	Abrahamskraal 29, Prince Albert		0.125
																700
										Total Diictodon:
										6.43258	7.97424	29.6409	55.8909	29.2	50	738.333
Collection number	Number	Collection	Higher Taxon	Family or Clade	Genus	Species	Source of ID	Locality		Upper Moordenaars	Lower Karelskraal	Upper Karelskraal	Lower Poortjie	Middle Poortjie	Upper Poortjie	Lower Hoedemaker
BP/1/5485	5485	ESI	Biarmosuchia	Burnetiamorpha	Burnetiidae indet.		M Day 2017 (burnetiamorph); CFK 31-08-2015 and Rubidge and Van den Heever 1997 (Styrcocephalus)	Stellenboschvlei 147, Murraysburg				1
BP/1/7098	7098	ESI	Biarmosuchia	Burnetiamorpha	Burnetiamorph sp.		Day et al. 2016	Springfontein, Rondom 247, Baufort West						1
BP/1/7555	7555	ESI	Biarmosuchia	Burnetiamorpha	Burnetiamorph indet.		M Day 2016	Muggefontein, farm 404, Beaufort West						1
SAM-PK-011875	11875	SAM	Biarmosuchia	Ictidorhinidae'	Ictidorhinid?		Van den Heever, 1988	Perdewater, Veldmans River 9, Prince Albert		0.166667
SAM-PK-K252	252	SAM	Biarmosuchia	Basal Biarmosuchia	Hipposaurus	brinki	Sigogneau-Russel 1989	Rietfontein 12, Prince Albert		0.0909091	0.0909091	0.0909091	0.0909091
From Day et al (2018) for lower Hoedemaker extra																2
										Total Biarmosuchians:
										0.257576	0.0909091	1.09091	0.0909091	2	0	2
Collection number	Number	Collection	Higher Taxon	Family or Clade	Genus	Species	Source of ID	Locality		Upper Moordenaars	Lower Karelskraal	Upper Karelskraal	Lower Poortjie	Middle Poortjie	Upper Poortjie	Lower Hoedemaker
B46	46	CGS	Pan-Testudines	Pan-Testudines	Eunotosaurus	africanus	Not seen but hard to mistake	Stellenboschvlei 147, Murraysburg				1
cdb3		CGS	Pan-Testudines	Pan-Testudines	Eunotosaurus	africanus	Not seen but hard to mistake	Droogvoets Fontein 356 (coords farm 361), Fraserburg			1
GM71		CGS	Pan-Testudines	Pan-Testudines	Eunotosaurus	africanus	Lyson et al, 2013	Bord Vol Water 313, Fraserburg		0.5	0.5
NHMUK R1968	4949	NHMUK	Pan-Testudines	Pan-Testudines	Eunotosaurus	africanus	Seeley, 1892	Weltevreden 76, Prince Albert		0.111111	0.111111	0.111111
NHMUK R4054		NHMUK	Pan-Testudines	Pan-Testudines	Eunotosaurus	africanus	Lyson et al, 2013	Rietfontein 56, Prince Albert		0.1	0.1	0.1
NHMUK R49423		NHMUK	Pan-Testudines	Pan-Testudines	Eunotosaurus	africanus	Lyson et al, 2013	Weltevreden 76, Prince Albert		0.111111	0.111111	0.111111
SAM-PK-011954		SAM	Pan-Testudines	Pan-Testudines	Eunotosaurus	africanus	Lyson et al, 2013	De Kruis Van Bloemfontein 323, Fraseburg		0.5	0.5
SAM-PK-K00207		SAM	Pan-Testudines	Pan-Testudines	Eunotosaurus	africanus	Lyson et al, 2013	Lammerkraal, Lammerskraal 11, Beaufort West		0.25
SAM-PK-K06732		SAM	Pan-Testudines	Pan-Testudines	Eunotosaurus	africanus	Not seen but hard to mistake	Amandelboom, Ryers Valley 401, Beaufort West						0.5	0.5
SAM-PK-K07611	K07611	SAM	Pan-Testudines	Pan-Testudines	Eunotosaurus	africanus	Lyson et al, 2013	Bloukrans 31, Prince Albert		0.142857	0.142857	0.142857
SAM-PK-K07670	K07670	SAM	Pan-Testudines	Pan-Testudines	Eunotosaurus	africanus	Lyson et al, 2013	Springfontein, Springfontein 305, Beaufort West		0.333333
SAM-PK-K07909		SAM	Pan-Testudines	Pan-Testudines	Eunotosaurus	africanus	Lyson et al, 2013	Klipbank, Klipbanksfontein 137, Beaufort West				0.5	0.5
SAM-PK-K07910		SAM	Pan-Testudines	Pan-Testudines	Eunotosaurus	africanus	Lyson et al, 2013	Klipbank, Klipbanksfontein 137, Beaufort West				0.5	0.5
SAM-PK-K07911		SAM	Pan-Testudines	Pan-Testudines	Eunotosaurus	africanus	Lyson et al, 2013	Klipbank, Klipbanksfontein 137, Beaufort West				0.5	0.5
USNM 23099		USNM	Pan-Testudines	Pan-Testudines	Eunotosaurus	africanus	Lyson et al, 2013	"Beaufort West" no locality		0.166667	0.166667	0.166667	0.166667	0.166667	0.166667
										Total Eunotosaurus:
										2.21508	2.63175	3.13175	1.66667	0.666667	0.666667	0

## Sheet: Supplementary Table 2
Specimen # BP/1/	Taxon	Genus/Family ID	Source of ID	Locality	m on section
7395	Basal Synapsida	cf. Pelycosauria	M Day 2016; K Angielczyk	"Vanvuurenskop"	3
7280b	Basal Synapsida	Varanopidae indet.	M Ezcurra 2016	"Vanvuurenskop"	0
7386	Dicynodontia	Diictodon	M Day 2016	"Vanvuurenskop"	20
7282	Dicynodontia	Diictodon	J Frobisch	"Vanvuurenskop"	107
7402	Dicynodontia	Diictodon	M Day 2016	"Vanvuurenskop"	118
7288	Dicynodontia	Diictodon	M Day 2016	"Vanvuurenskop"	0
7357	Dicynodontia	Diictodon	M Day 2016	"Vanvuurenskop"	0
7369	Dicynodontia	Diictodon	M Day 2016	"Vanvuurenskop"	0
7280a	Dicynodontia	Diictodon	M Day 2016	"Vanvuurenskop"	0
7303	Dicynodontia	Diictodon	M Day 2016	"Vanvuurenskop"	109
7369	Dicynodontia	Diictodon	M Day 2016	"Vanvuurenskop"	11
7282	Dicynodontia	Diictodon	M Day 2016	"Vanvuurenskop"	110
7303	Dicynodontia	Diictodon	M Day 2016	"Vanvuurenskop"	110
7311	Dicynodontia	Diictodon	K Angielczyk	"Vanvuurenskop"	110
7313	Dicynodontia	Diictodon	M Day 2016	"Vanvuurenskop"	110
7316	Dicynodontia	Diictodon	M Day 2016	"Vanvuurenskop"	110
7323	Dicynodontia	Diictodon	M Day 2016	"Vanvuurenskop"	120
7407	Dicynodontia	Diictodon	M Day 2016	"Vanvuurenskop"	120
7305	Dicynodontia	Diictodon	M Day 2016	"Vanvuurenskop"	133
7323	Dicynodontia	Diictodon	M Day 2016	"Vanvuurenskop"	133
7407	Dicynodontia	Diictodon	M Day 2016	"Vanvuurenskop"	133
7611	Dicynodontia	Diictodon	K Angielczyk	"Vanvuurenskop"	138
7347	Dicynodontia	Diictodon	J Frobisch	"Vanvuurenskop"	186
7286	Dicynodontia	Diictodon	M Day 2016	"Vanvuurenskop"	200
7347	Dicynodontia	Diictodon	M Day 2016	"Vanvuurenskop"	200
7354	Dicynodontia	Diictodon	M Day 2016	"Vanvuurenskop"	227
7355	Dicynodontia	Diictodon	M Day 2016	"Vanvuurenskop"	233
7406	Dicynodontia	Diictodon	M Day 2016	"Vanvuurenskop"	236
7605	Dicynodontia	Diictodon	K Angielczyk	"Vanvuurenskop"	289
7308	Dicynodontia	Diictodon	K Angielczyk	"Vanvuurenskop"	292
7321	Dicynodontia	Diictodon	M Day 2016	"Vanvuurenskop"	43
7322	Dicynodontia	Diictodon	M Day 2016	"Vanvuurenskop"	46
7302	Dicynodontia	Diictodon	M Day 2016	"Vanvuurenskop"	70
7319	Dicynodontia	Diictodon?	K Angielczyk	"Vanvuurenskop"	15
7381	Dicynodontia	Diictodon?	M Day 2016	"Vanvuurenskop"	110
7465	Dicynodontia	Diictodon?	M Day 2016	"Vanvuurenskop"	110
7370	Dicynodontia	Diictodon?	M Day 2016	"Vanvuurenskop"	240
7318	Dicynodontia	Diictodon?	M Day 2016	"Vanvuurenskop"	65
7267	Dicynodontia	Endothiodon	M Day 2016	"Vanvuurenskop"	218
7250	Dicynodontia	Endothiodon	M Day 2016	"Vanvuurenskop"	228
7356	Dicynodontia	Endothiodon	M Day 2016	"Vanvuurenskop"	292
7251	Dicynodontia	Endothiodon?	M Day 2016	"Vanvuurenskop"	200
7348	Dicynodontia	Pristerodon	M Day 2016	"Vanvuurenskop"	288
7306	Dicynodontia	Pristerodon?	K Angielczyk	"Vanvuurenskop"	288
7314	Dicynodontia	Pristerodon?	M Day 2016	"Vanvuurenskop"	288
7816	Dicynodontia	Robertia?	K Angielczyk	"Vanvuurenskop"	0
7249	Dinocephalia	Anteosaurus	M Day 2016	"Vanvuurenskop"	0
7244	Dinocephalia	Anteosaurus	M Day 2016	"Vanvuurenskop"	10
7246	Dinocephalia	cf. Tapinocephalia	M Day 2016	"Vanvuurenskop"	0
7242	Dinocephalia	Dinocephalia indet.	M Day 2016	"Vanvuurenskop"	10
7245	Dinocephalia	Dinocephalia indet.	M Day 2016	"Vanvuurenskop"	7
7255	Dinocephalia	Tapinocephalidae indet.	M Day 2019	"Vanvuurenskop"	110
7261	Dinocephalia	Tapinocephalidae indet.	M Day 2016	"Vanvuurenskop"	2
7243	Dinocephalia	Titanosuchidae indet.	M Day 2016	"Vanvuurenskop"	0
7259	Dinocephalia	Titanosuchidae indet.	M Day 2016	"Vanvuurenskop"	94
7821	Gorgonopsia	Eriphostoma	Kammerer et al 2015	"Vanvuurenskop"	17
7275	Gorgonopsia	Eriphostoma	M Day 2016	"Vanvuurenskop"	290
7269	Gorgonopsia	Gorgonops?	C Kammerer	"Vanvuurenskop"	270
7247	Procolophonomorpha	Bradysaurus/Nochelesaurus	M Van den Brandt 2019	"Vanvuurenskop"	2
7252	Procolophonomorpha	Nochelesaurus	M Van den Brandt 2019	"Vanvuurenskop"	12
7241	Procolophonomorpha	Pareiasauria indet.	M Day 2016	"Vanvuurenskop"	13
7266	Procolophonomorpha	Pareiasauria indet.	M van den Brandt	"Vanvuurenskop"	17
7276	Procolophonomorpha	Pareiasauridae indet.	M Day 2016	"Vanvuurenskop"	297
7373	Therocephalia	Basal thercephalian	M Day 2016	"Vanvuurenskop"	7
7263	Therocephalia	cf. Scylacosauridae	M Day 2016	"Vanvuurenskop"	0
7301	Therocephalia	Lycosuchidae?	M Day 2016	"Vanvuurenskop"	110
7265	Therocephalia	Scylacosauridae indet.	M Day 2016	"Vanvuurenskop"	213
7368	Therocephalia?	Therocephalia indet?	M Day 2016	"Vanvuurenskop"	248
7555	Biarmosuchia	Burnetiamorpha indet.	M Day 2016	Muggefontein	191
7574	Dicynodontia	Cryptodontia indet.	K Angielczyk	Muggefontein	305
7560	Dicynodontia	Cryptodontia indet.	K Angielczyk	Muggefontein	306
7532	Dicynodontia	Dicynodont indet.	M Day 2016	Muggefontein	49
7552	Dicynodontia	Dicynodont indet.	M Day 2016	Muggefontein	185
7506	Dicynodontia	Dicynodont indet.	M Day 2016	Muggefontein	295
7500	Dicynodontia	Dicynodont indet.	M Day 2016	Muggefontein	299
7578	Dicynodontia	Dicynodont indet.	M Day 2016	Muggefontein	306
7533	Dicynodontia	Dicynodont indet.	M Day 2016	Muggefontein	309
7591	Dicynodontia	Dicynodont indet.	K Angielczyk	Muggefontein	320
7590	Dicynodontia	Dicynodontia cf. Brachyprosopus/Endothiodon	M Day 2016; K Angielczyk	Muggefontein	288
7554	Dicynodontia	Dicynodontia cf. Eosimops	M Day 2019	Muggefontein	47
7566	Dicynodontia	Dicynodontoides	K Angielczyk	Muggefontein	310
7483	Dicynodontia	Diictodon	M Day 2016	Muggefontein	0
7549	Dicynodontia	Diictodon	M Day 2016	Muggefontein	45
7528	Dicynodontia	Diictodon	B. Rubidge	Muggefontein	51
7529	Dicynodontia	Diictodon	M Day 2016	Muggefontein	92
7603	Dicynodontia	Diictodon	B. Rubidge/ Ken Angielczyk	Muggefontein	126
7480	Dicynodontia	Diictodon	M Day 2016	Muggefontein	133
7491	Dicynodontia	Diictodon	M Day 2016	Muggefontein	133
7498	Dicynodontia	Diictodon	M Day 2016	Muggefontein	133
7546	Dicynodontia	Diictodon	M Day 2016	Muggefontein	133
7604	Dicynodontia	Diictodon	M Day 2016	Muggefontein	133
7541	Dicynodontia	Diictodon	M Day 2016	Muggefontein	140
7523	Dicynodontia	Diictodon	M Day 2016	Muggefontein	142
7633	Dicynodontia	Diictodon	M Day 2016	Muggefontein	144
7598	Dicynodontia	Diictodon	M Day 2016	Muggefontein	145
7670	Dicynodontia	Diictodon	M Day 2016	Muggefontein	145
7485	Dicynodontia	Diictodon	M Day 2016	Muggefontein	166
7596	Dicynodontia	Diictodon	M Day 2016	Muggefontein	177
7526	Dicynodontia	Diictodon	M Day 2016	Muggefontein	183
7509	Dicynodontia	Diictodon	K Angielczyk	Muggefontein	185
7538	Dicynodontia	Diictodon	M Day 2016	Muggefontein	185
7628	Dicynodontia	Diictodon	K Angielczyk	Muggefontein	188
7487	Dicynodontia	Diictodon	M Day 2016	Muggefontein	190
7489	Dicynodontia	Diictodon	M Day 2016	Muggefontein	196
7502	Dicynodontia	Diictodon	M Day 2016	Muggefontein	217
7521	Dicynodontia	Diictodon	M Day 2016	Muggefontein	218
7512	Dicynodontia	Diictodon	M Day 2016	Muggefontein	252
7640	Dicynodontia	Diictodon	M Day 2016	Muggefontein	258
7478	Dicynodontia	Diictodon	M Day 2016	Muggefontein	281
7531	Dicynodontia	Diictodon	K Angielczyk	Muggefontein	281
7520	Dicynodontia	Diictodon	K Angielczyk	Muggefontein	296
7481	Dicynodontia	Diictodon	M Day 2016	Muggefontein	300
7486	Dicynodontia	Diictodon	M Day 2016	Muggefontein	300
7513	Dicynodontia	Diictodon	B. Rubidge	Muggefontein	300
7550	Dicynodontia	Diictodon	M Day 2016	Muggefontein	300
7501	Dicynodontia	Diictodon	M Day 2016	Muggefontein	302
7517	Dicynodontia	Diictodon	M Day 2016	Muggefontein	302
7477	Dicynodontia	Diictodon	M Day 2016	Muggefontein	303
7505	Dicynodontia	Diictodon	M Day 2016	Muggefontein	303
7524	Dicynodontia	Diictodon	K Angielczyk	Muggefontein	303
7637	Dicynodontia	Diictodon	M Day 2016	Muggefontein	303
7496	Dicynodontia	Diictodon	M Day 2016	Muggefontein	306
7459	Dicynodontia	Diictodon	M Day 2016	Muggefontein	307
7497	Dicynodontia	Diictodon	M Day 2016	Muggefontein	307
7503	Dicynodontia	Diictodon	B. Rubidge	Muggefontein	307
7504	Dicynodontia	Diictodon	M Day 2016	Muggefontein	310
7516	Dicynodontia	Diictodon	M Day 2016	Muggefontein	310
7519	Dicynodontia	Diictodon	M Day 2016	Muggefontein	311
7537	Dicynodontia	Diictodon	M Day 2016	Muggefontein	311
7488	Dicynodontia	Diictodon	M Day 2016	Muggefontein	312
7627	Dicynodontia	Diictodon	M Day 2016	Muggefontein	312
7479	Dicynodontia	Diictodon	M Day 2016	Muggefontein	313
7484	Dicynodontia	Diictodon	M Day 2016	Muggefontein	315
7518	Dicynodontia	Diictodon	M Day 2016	Muggefontein	315
7171	Dicynodontia	Diictodon	M Day 2016	Muggefontein	317
7610	Dicynodontia	Diictodon	M Day 2016	Muggefontein	319
7612	Dicynodontia	Diictodon	M Day 2016	Muggefontein	320
7639	Dicynodontia	Diictodon	M Day 2016	Muggefontein	320
7499	Dicynodontia	Diictodon or Prosictodon	M Day 2016	Muggefontein	250
7482	Dicynodontia	Diictodon?	M Day 2016	Muggefontein	133
7601	Dicynodontia	Diictodon?	M Day 2016	Muggefontein	144
7630	Dicynodontia	Diictodon?	M Day 2016	Muggefontein	145
7581	Dicynodontia	Diictodon?	K Angielczyk	Muggefontein	166
7593	Dicynodontia	Diictodon?	M Day 2016	Muggefontein	178
7597	Dicynodontia	Diictodon?	Ken Angielczyk	Muggefontein	178
7508	Dicynodontia	Diictodon?	M Day 2016	Muggefontein	186
7534	Dicynodontia	Diictodon?	K Angielczyk	Muggefontein	193
7490	Dicynodontia	Diictodon?	M Day 2016	Muggefontein	303
7525	Dicynodontia	Diictodon?	M Day 2016	Muggefontein	303
7515	Dicynodontia	Diictodon?	M Day 2016	Muggefontein	304
7583A	Dicynodontia	Diictodon?	K Angielczyk	Muggefontein	309
7545	Dicynodontia	Diictodon?	M Day 2016	Muggefontein	310
7511	Dicynodontia	Diictodon?	M Day 2016	Muggefontein	313
7622	Dicynodontia	Emydops	K Angielczyk	Muggefontein	185
7582	Dicynodontia	Emydops?	K Angielczyk	Muggefontein	317
7570	Dicynodontia	Endothiodon	M Day 2016	Muggefontein	186
7580	Dicynodontia	Endothiodon	K Angielczyk	Muggefontein	188
7460	Dicynodontia	Endothiodon	M Day 2016	Muggefontein	223
7564	Dicynodontia	Endothiodon	M Day 2016	Muggefontein	285
7543	Dicynodontia	Indet.	M Day 2016	Muggefontein	312
7609	Dicynodontia	Pristerodon	B. Rubidge/Mike Day	Muggefontein	192
7614	Dicynodontia	Pristerodon	K Angielczyk	Muggefontein	193
7536	Dicynodontia	Pristerodon	K Angielczyk	Muggefontein	249
7620	Dicynodontia	Pristerodon	B. Rubidge/ Ken Angielczyk	Muggefontein	251
7535	Dicynodontia	Pristerodon	K Angielczyk	Muggefontein	252
7613	Dicynodontia	Pristerodon	K Angielczyk	Muggefontein	289
7623	Dicynodontia	Pristerodon	K Angielczyk	Muggefontein	310
7594	Dicynodontia	Pristerodon?	K Angielczyk	Muggefontein	14
7631	Dicynodontia	Pristerodon?	B. Rubidge	Muggefontein	51
7636	Dicynodontia	Pristerodon?	K Angielczyk	Muggefontein	234
7632	Dicynodontia	Pristerodon?	M Day 2016	Muggefontein	253
7638	Dicynodontia	Pristerodon?	M Day 2016	Muggefontein	304
7615	Dicynodontia	Pristerodon?	B. Rubidge	Muggefontein	309
7608	Dicynodontia	Pylaecephalidae indet.	M Day 2016	Muggefontein	185
7621	Dicynodontia	Robertia?	Ken Angielczyk	Muggefontein	47
7530	Dicynodontia	Tetrapoda indet.	K Angielczyk	Muggefontein	185
7618	Dicynodontia	Tropidostoma	K Angielczyk	Muggefontein	287
7565	Dicynodontia	Tropidostoma	K Angielczyk; M Day 2017	Muggefontein	288
7606	Dicynodontia	Tropidostoma	K Angielczyk	Muggefontein	305
7563	Dicynodontia	Tropidostoma	M Day 2016	Muggefontein	306
7624	Dicynodontia	Tropidostoma	K Angielczyk	Muggefontein	312
7562	Dicynodontia	Tropidostoma	K Angielczyk	Muggefontein	316
7572	Dicynodontia	Tropidostoma	K Angielczyk	Muggefontein	319
7583B	Dicynodontia	Tropidostoma	K Angielczyk	Muggefontein	324
7573	Dicynodontia	Tropidostoma?	K Angielczyk	Muggefontein	300
7577	Dicynodontia	Tropidostoma?	K Angielczyk	Muggefontein	304
7567	Dicynodontia	Tropidostoma?	M Day 2016	Muggefontein	305
7561	Dicynodontia	Tropidostoma?	M Day 2016	Muggefontein	307
7553	Synapsida	Basal anomodont cf. Galechirus?	F Abdala 2016	Muggefontein	131
7559	Therapsida	Theriodont indet.	B. Rubidge	Muggefontein	0
7557	Therocephalia	Dicynodont?	M Day 2016	Muggefontein	281
7492	Therocephalia	Ictidosuchoides	A Huttenlocker	Muggefontein	251
7738	Therocephalia	Scylacosauridae indet.	F Abdala	Muggefontein	137
7232	Dicynodontia	Diictodon	M Day/Jorg Frobisch	Puntkraal	63
7211	Dicynodontia	Diictodon	K Angielczyk	Puntkraal	126
7201	Dicynodontia	Diictodon	K Angielczyk	Puntkraal	133
7209	Dicynodontia	Diictodon	K Angielczyk	Puntkraal	147
7229	Dicynodontia	Diictodon	M Day/Jorg Frobisch	Puntkraal	159
7210	Dicynodontia	Diictodon	K Angielczyk	Puntkraal	162
7226	Dicynodontia	Diictodon	Jorg Frobisch	Puntkraal	162
7233	Dicynodontia	Diictodon	Jorg Frobisch	Puntkraal	210
7237	Dicynodontia	Diictodon?	M Day	Puntkraal	67
7469	Dicynodontia	Diictodon?	M Day 2016	Puntkraal	159
7191	Dicynodontia	Diictodon?	K Angielczyk	Puntkraal	161
7379	Dicynodontia	Endothiodon	M Day 2016	Puntkraal	184
7376	Dicynodontia	Endothiodon?	M Day 2016	Puntkraal	197
7194	Dicynodontia	Pristerodon	K Angielczyk	Puntkraal	157
7195	Dicynodontia	Pristerodon	C Kammerer	Puntkraal	160
7196	Dicynodontia	Pristerodon	B Rubidge	Puntkraal	160
7206	Dicynodontia	Pristerodon	C Kammerer 2015	Puntkraal	160
7193	Dicynodontia	Pristerodon	K Angielczyk	Puntkraal	163
7204	Dicynodontia	Pristerodon	K Angielczyk	Puntkraal	184
7205	Dicynodontia	Pristerodon	K Angielczyk	Puntkraal	184
7231	Dicynodontia	Pristerodon?	M Day	Puntkraal	164
7173B	Dinocephalia	cf. Anteosaurus	M Day 2016	Puntkraal	28
7184	Dinocephalia	cf. Anteosaurus	M Day 2016	Puntkraal	140
7172	Dinocephalia	cf. Tapinocephalidae	M Day 2016	Puntkraal	107
7182	Dinocephalia	Dinocephalia indet.	M Day 2016	Puntkraal	146
7179	Dinocephalia	Dinocephalia indet.	M Day 2016	Puntkraal	163
7170	Dinocephalia	Indet.	M Day 2016	Puntkraal	28
7180	Dinocephalia	Indet.	M Day 2016	Puntkraal	37
7173A	Dinocephalia	Tapinocephalia indet.	M Day 2016	Puntkraal	28
7186	Dinocephalia	Tapinocephalid indet	M Day 2016	Puntkraal	37
7185	Dinocephalia	Tapinocephalid indet	M Day 2016	Puntkraal	39
7183	Dinocephalia	Tapinocephalid indet	M Day 2016	Puntkraal	111
7169	Dinocephalia	Tapinocephalidae indet	M Day 2016	Puntkraal	156
7240	Dinocephalia	Tapinocephalidae indet.	M Day 2016	Puntkraal	164
7380	Dinocephalia	Titanosuchidae indet.	M Day 2016	Puntkraal	34
7168	Dinocephalia	Titanosuchidae indet.	M Day 2016	Puntkraal	140
7167	Procolophonomorpha	Pareiasaur indet.	M Day 2016	Puntkraal	41
7377	Stereospondyli	Rhinesuchidae indet.	M Day 2016	Puntkraal	178
7187A	Therocephalia	Lycosuchidae indet.	M Day 2016	Puntkraal	97
7967	Therocephalia	Lycosuchidae indet.	Fernando Abdala	Puntkraal	124
